# Supplementary material for: Early Immune Remodeling Steers Clinical Response to First-Line Chemoimmunotherapy in Advanced Gastric Cancer
Source: PubMed Central journal article supplement — Cancer Discov. 2024 Feb 6;14(5):766–85. doi: 10.1158/2159-8290.CD-23-0857 (PMC11061611; doi:10.1158/2159-8290.cd-23-0857), 2024-02-06
Supplement: cd-23-0857_figure_s1_suppsf1.pdf [file cd-23-0857_figure_s1_suppsf1.pdf]

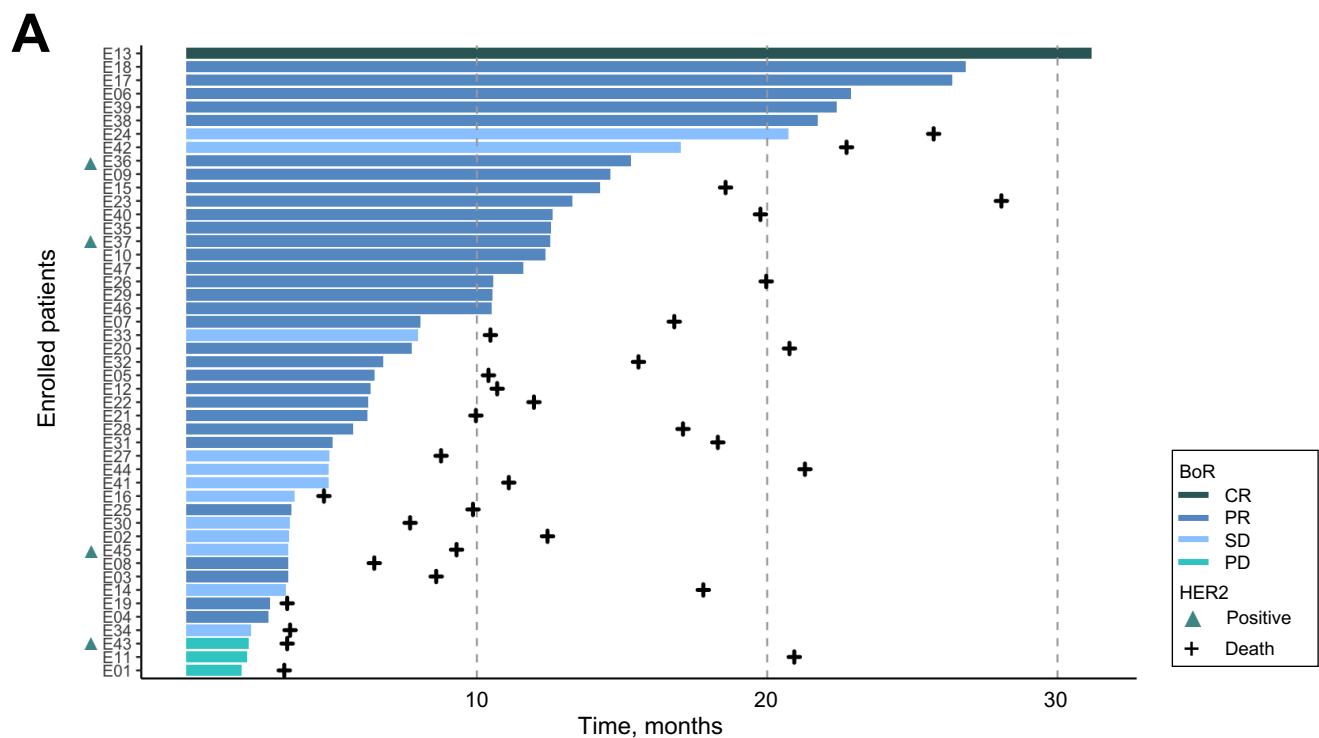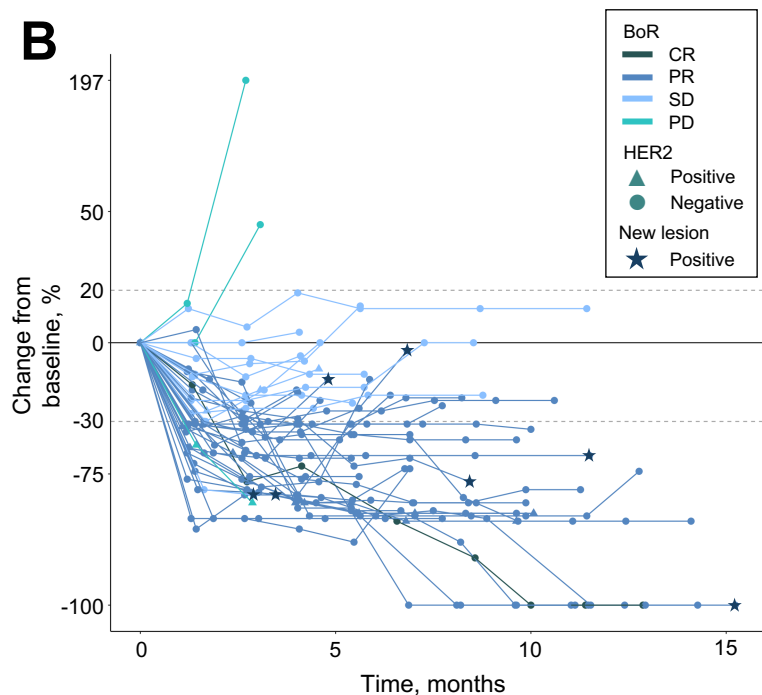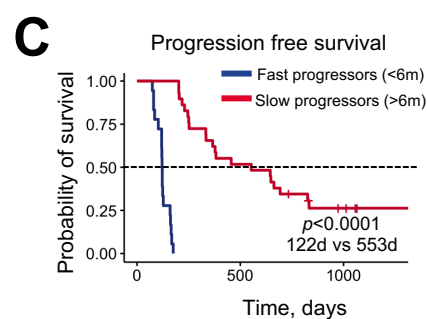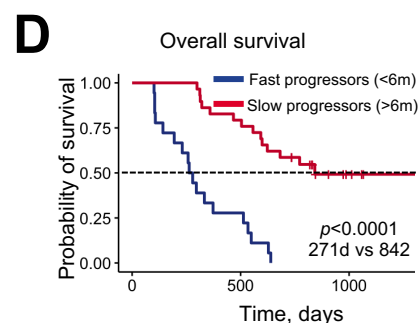

**Figure S1.** (A) Swimmers plot of patient response and duration in the described clinical trial. (B) Scatter plot showing temporal course of tumor response measured by RECIST for all patients in the reported clinical trial. (C) Progression free survival (PFS) and (D) overall survival (OS) for all patients in the reported clinical trial separated by fast and slow progressors.
