# Supplementary material for: Early Immune Remodeling Steers Clinical Response to First-Line Chemoimmunotherapy in Advanced Gastric Cancer
Source: PubMed Central journal article supplement — Cancer Discov. 2024 Feb 6;14(5):766–85. doi: 10.1158/2159-8290.CD-23-0857 (PMC11061611; doi:10.1158/2159-8290.cd-23-0857), 2024-02-06
Supplement: cd-23-0857_figure_s2_suppsf2.pdf [file cd-23-0857_figure_s2_suppsf2.pdf]

**A**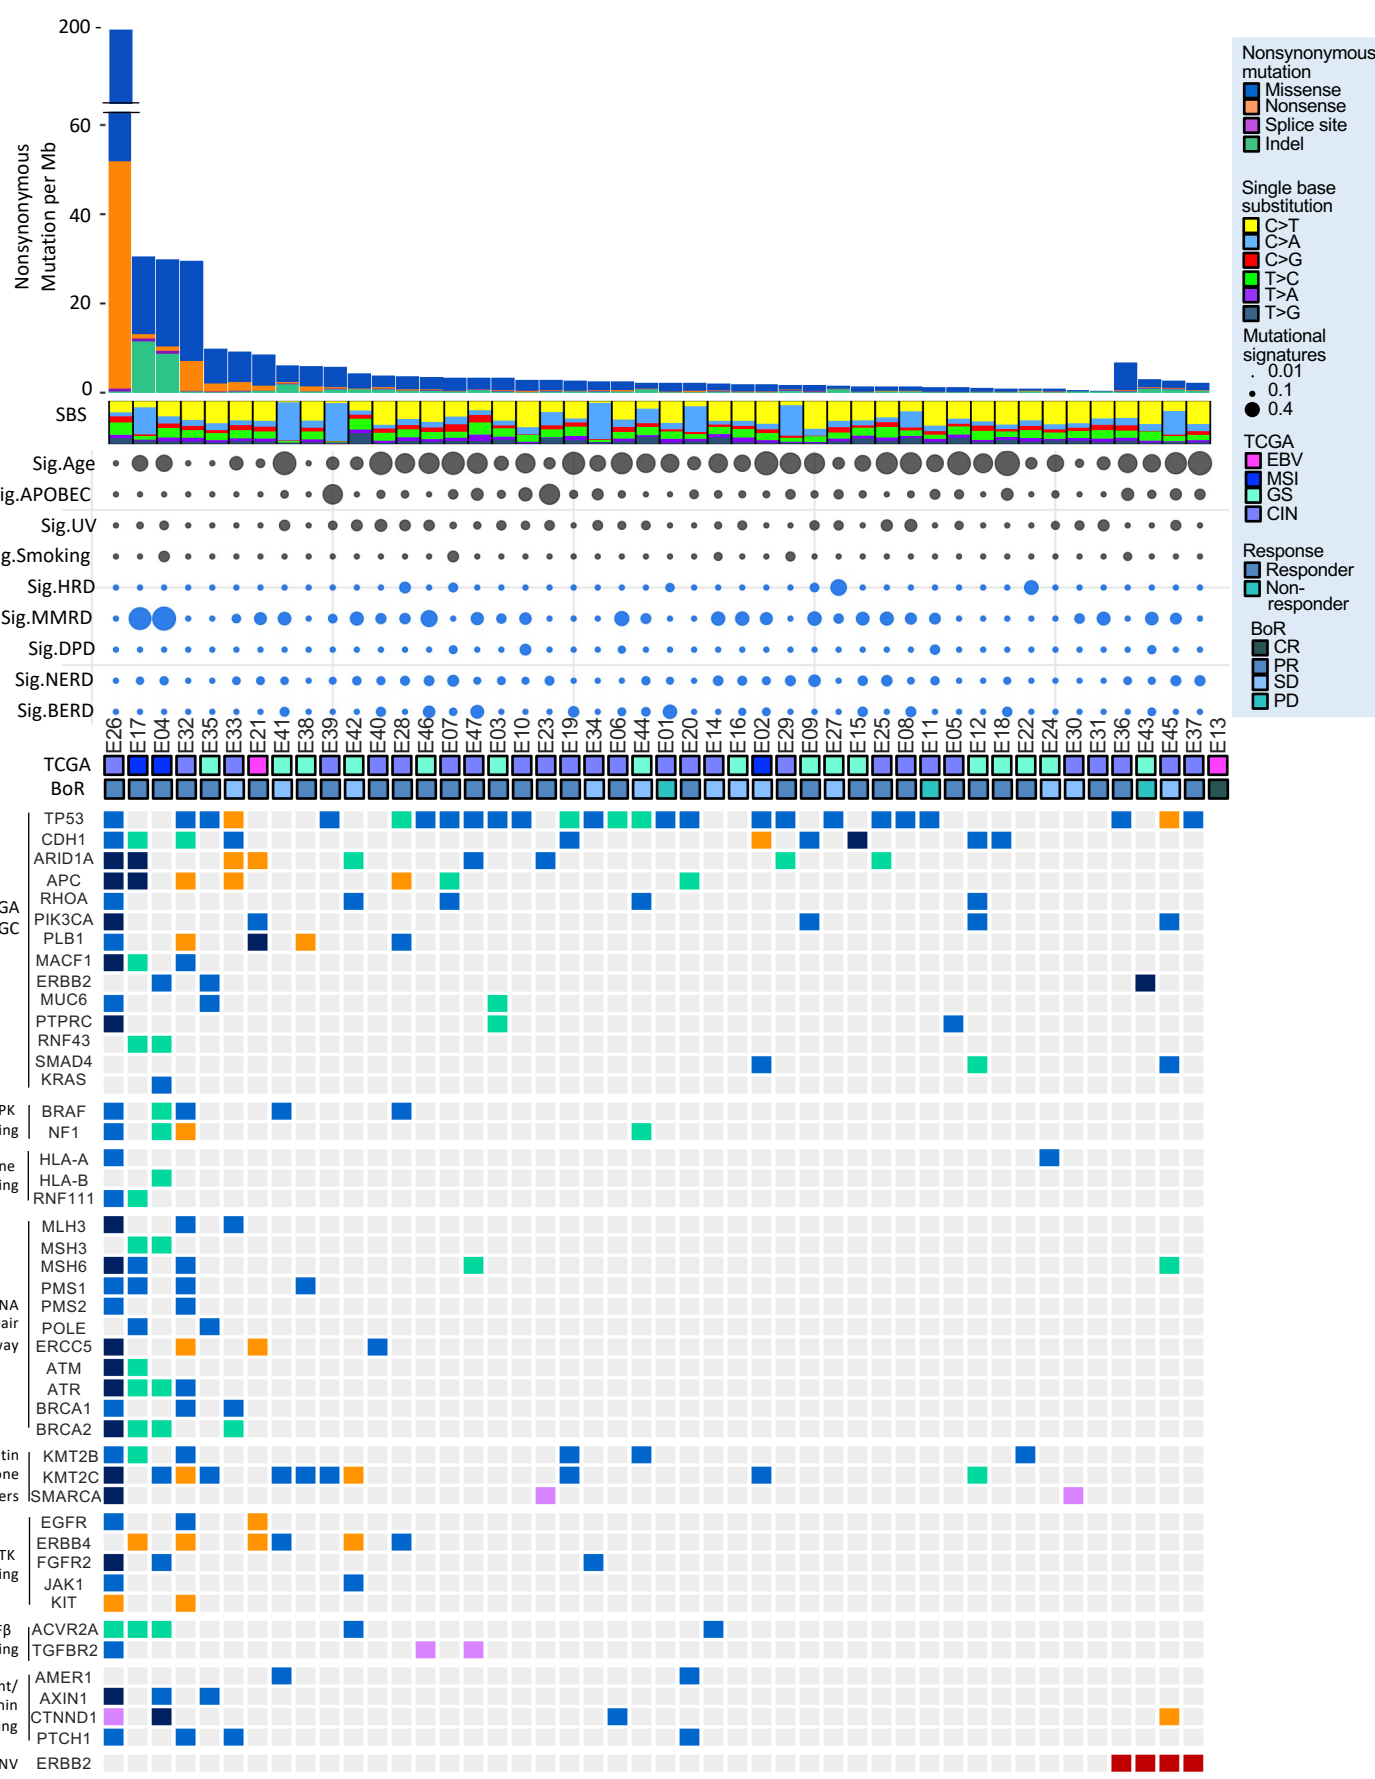**B**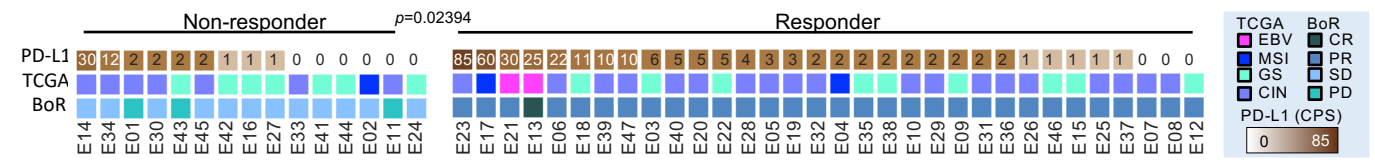

**Figure S2.** (A) CoMut plot demonstrating TCGA subtype, tumor mutational burden, mutational signature enrichment and mutational profiles of key driver genes for all patient samples at baseline in the reported clinical trial. (B) PD-L1 expression for each patient sample at baseline in the reported clinical trial.
