# Supplementary material for: Early Immune Remodeling Steers Clinical Response to First-Line Chemoimmunotherapy in Advanced Gastric Cancer
Source: PubMed Central journal article supplement — Cancer Discov. 2024 Feb 6;14(5):766–85. doi: 10.1158/2159-8290.CD-23-0857 (PMC11061611; doi:10.1158/2159-8290.cd-23-0857), 2024-02-06
Supplement: cd-23-0857_figure_s3_suppsf3.pdf [file cd-23-0857_figure_s3_suppsf3.pdf]

**A**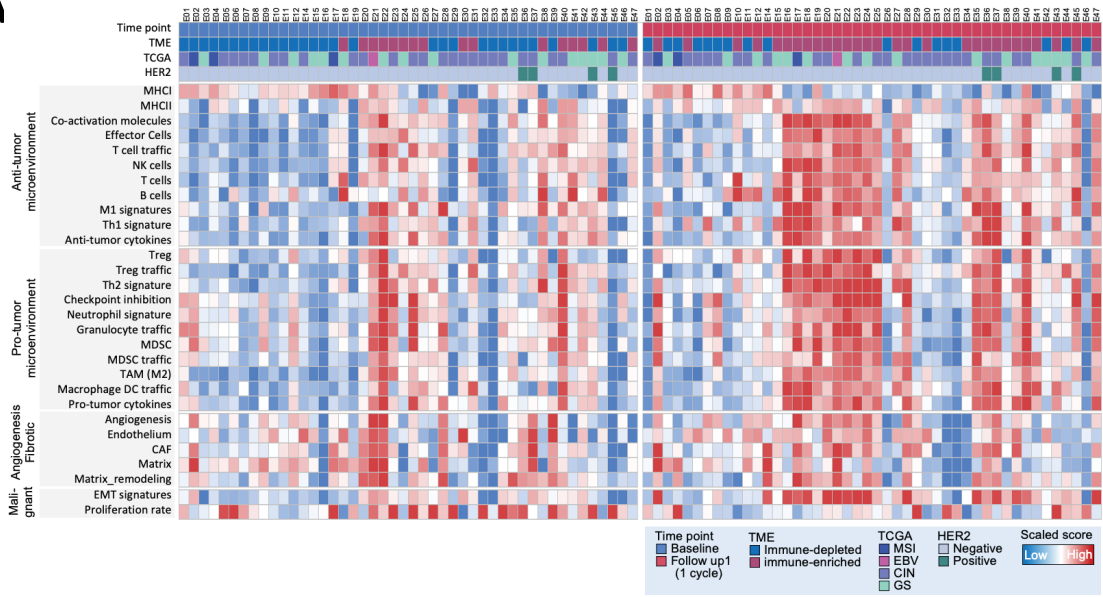**B**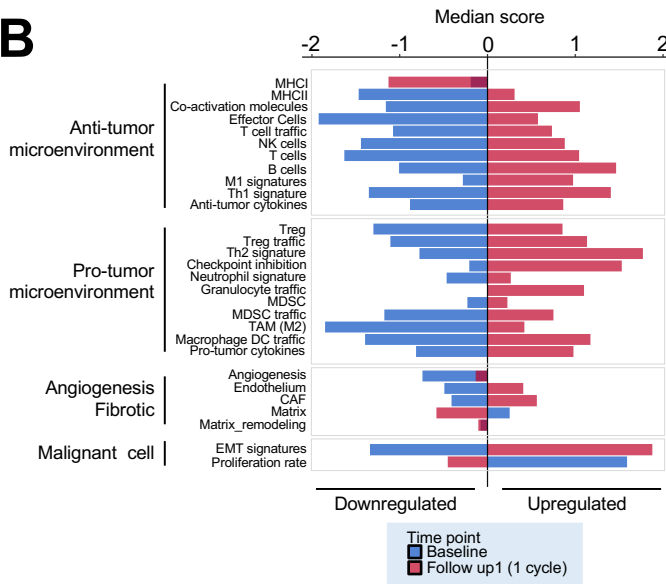**D**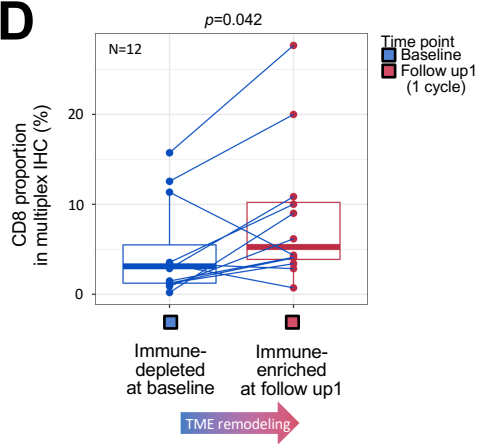**C**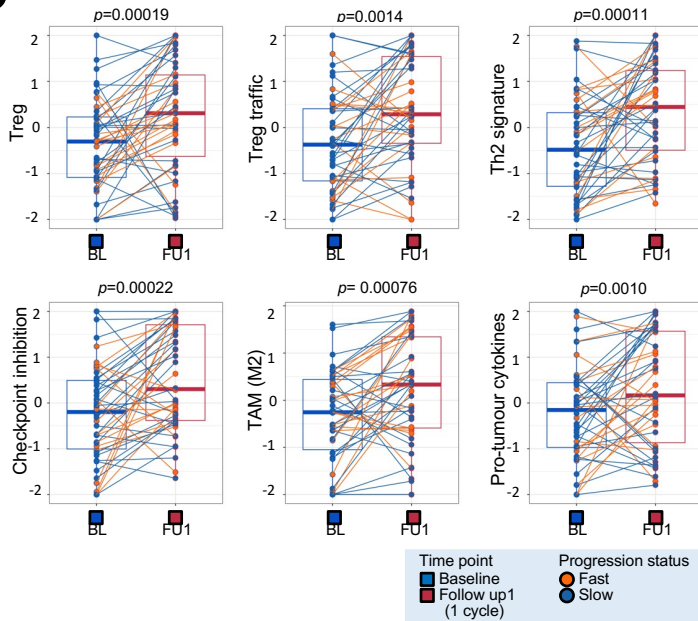

**Figure S3.** (A) Enrichment of gene expression signatures for TME subtypes using bulk RNA-sequencing data for all patient samples at baseline and after chemotherapy (follow-up 1; FU1). (B) Pathway enrichment analysis on differentially expressed genes comparing bulk RNA-seq profiles for samples obtained pre-treatment (baseline) and samples obtained after 1 cycle of chemotherapy (FU1). (C) Plots demonstrating change in immune related gene signatures (Treg, Treg trafficking, Th2, immune checkpoints, M2 macrophages, pro-tumorigenic cytokines) after chemotherapy treatment. Lines connect samples obtained from the same patient. Statistical comparison performed using a Wilcoxon signed-rank test. (D) Quantification of CD8<sup>+</sup> cell abundance using immunohistochemistry (IHC) at baseline and after chemotherapy (FU1) in 12 patient samples. Statistical comparison performed using a Wilcoxon signed-rank test.
