# Supplementary material for: Early Immune Remodeling Steers Clinical Response to First-Line Chemoimmunotherapy in Advanced Gastric Cancer
Source: PubMed Central journal article supplement — Cancer Discov. 2024 Feb 6;14(5):766–85. doi: 10.1158/2159-8290.CD-23-0857 (PMC11061611; doi:10.1158/2159-8290.cd-23-0857), 2024-02-06
Supplement: cd-23-0857_figure_s4_suppsf4.pdf [file cd-23-0857_figure_s4_suppsf4.pdf]

**A**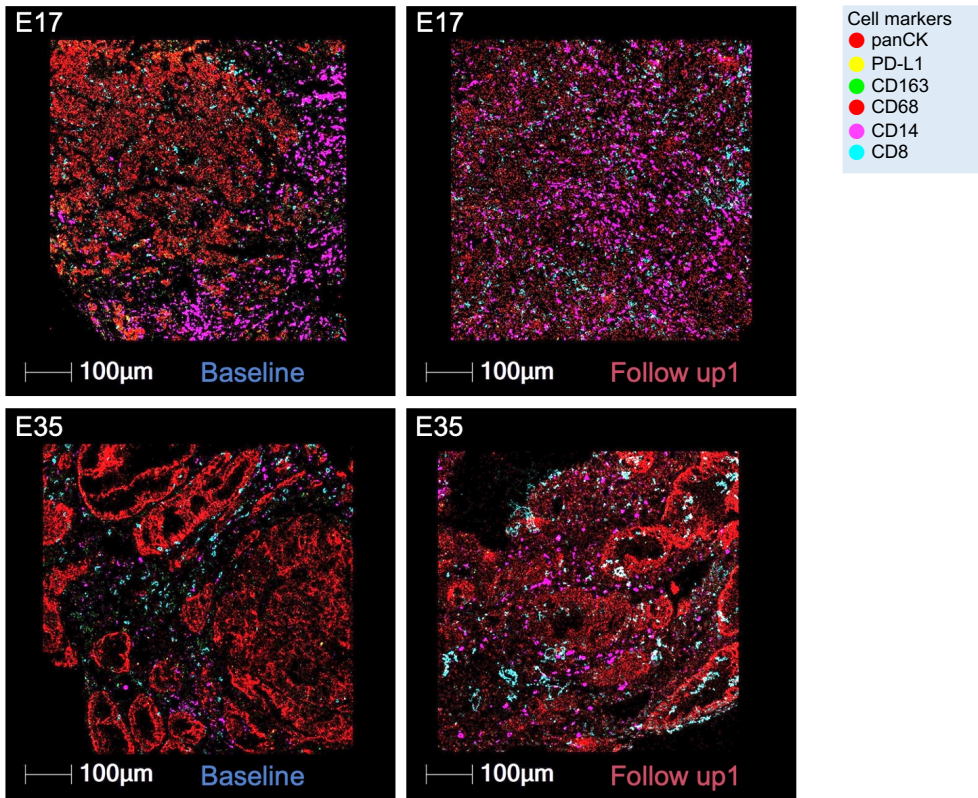**B**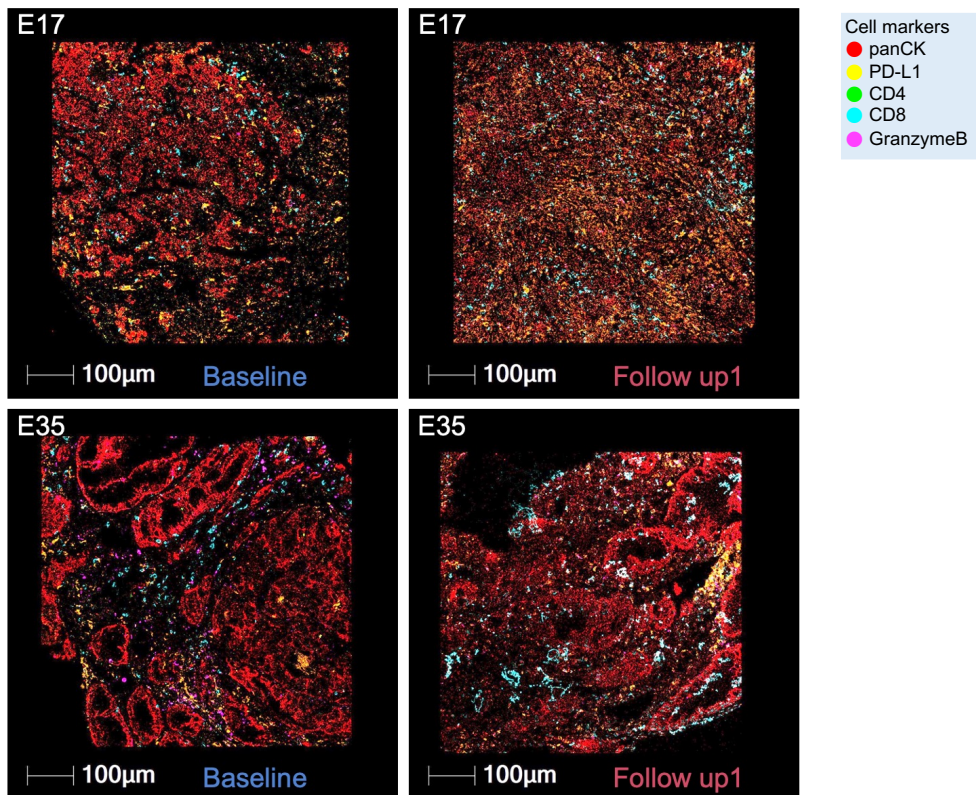

**Figure S4.** Multiplexed immunofluorescence (mIF) images of BL and FU1 samples from two patients, E17 (slow progressor) and E35 (fast progressor), staining for (A) panCK, PD-L1, CD163, CD68, CD14 and CD8, and (B) panCK, PD-L1, CD4, CD8 and Granzyme B.
