# Supplementary material for: Early Immune Remodeling Steers Clinical Response to First-Line Chemoimmunotherapy in Advanced Gastric Cancer
Source: PubMed Central journal article supplement — Cancer Discov. 2024 Feb 6;14(5):766–85. doi: 10.1158/2159-8290.CD-23-0857 (PMC11061611; doi:10.1158/2159-8290.cd-23-0857), 2024-02-06
Supplement: cd-23-0857_figure_s5_suppsf5.pdf [file cd-23-0857_figure_s5_suppsf5.pdf]

Timepoint  
 ● Baseline  
 ● Follow up1  
 ● Follow up2

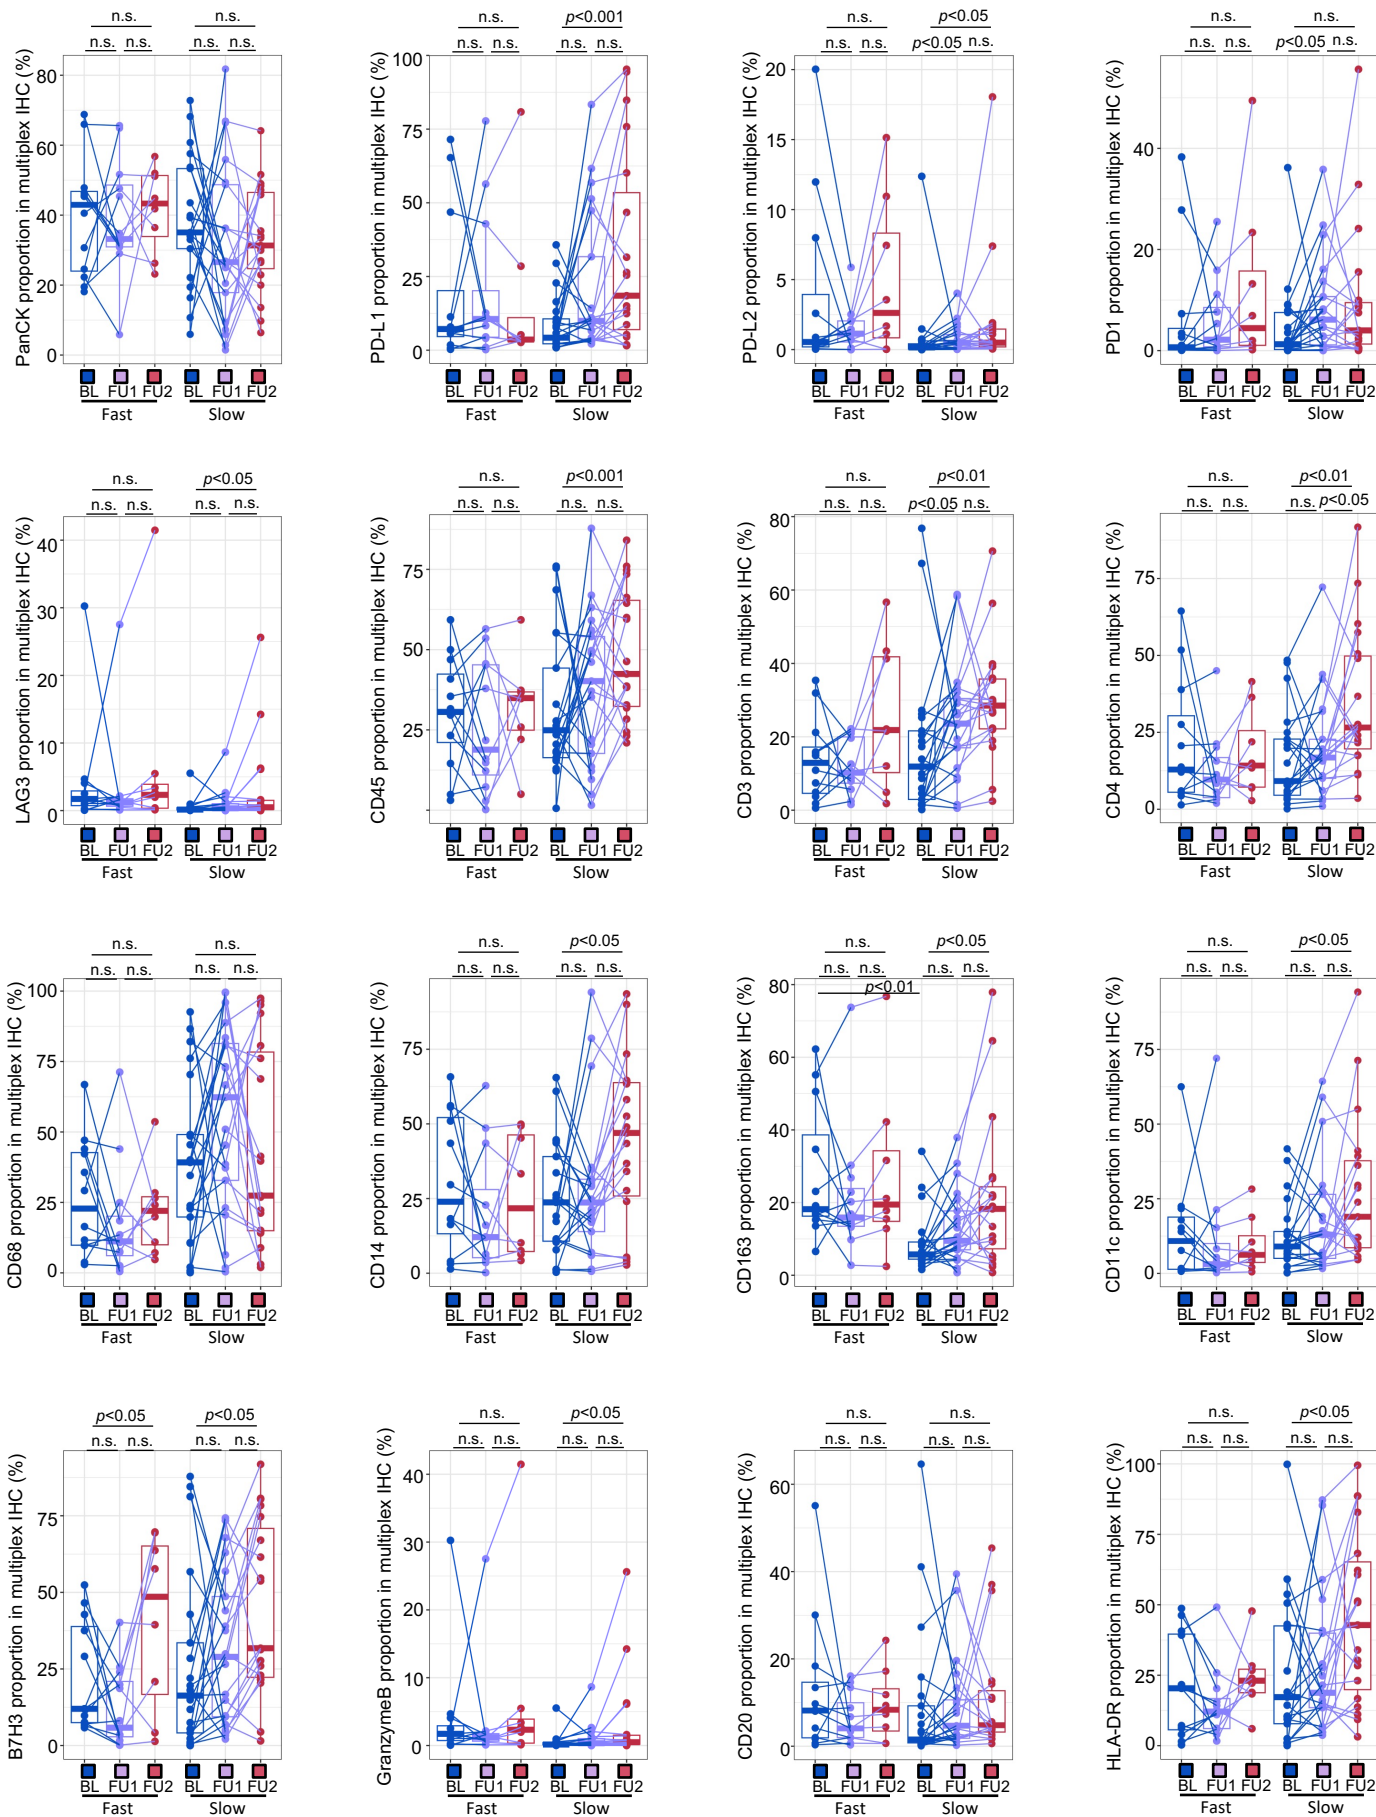

**Figure S5.** Proportion of cells expression each of the 16 markers used for multiplex immunohistochemistry (mIHC) split by timepoint and fast vs slow progressor status.
