# Supplementary material for: Early Immune Remodeling Steers Clinical Response to First-Line Chemoimmunotherapy in Advanced Gastric Cancer
Source: PubMed Central journal article supplement — Cancer Discov. 2024 Feb 6;14(5):766–85. doi: 10.1158/2159-8290.CD-23-0857 (PMC11061611; doi:10.1158/2159-8290.cd-23-0857), 2024-02-06
Supplement: cd-23-0857_figure_s7_suppsf7.pdf [file cd-23-0857_figure_s7_suppsf7.pdf]

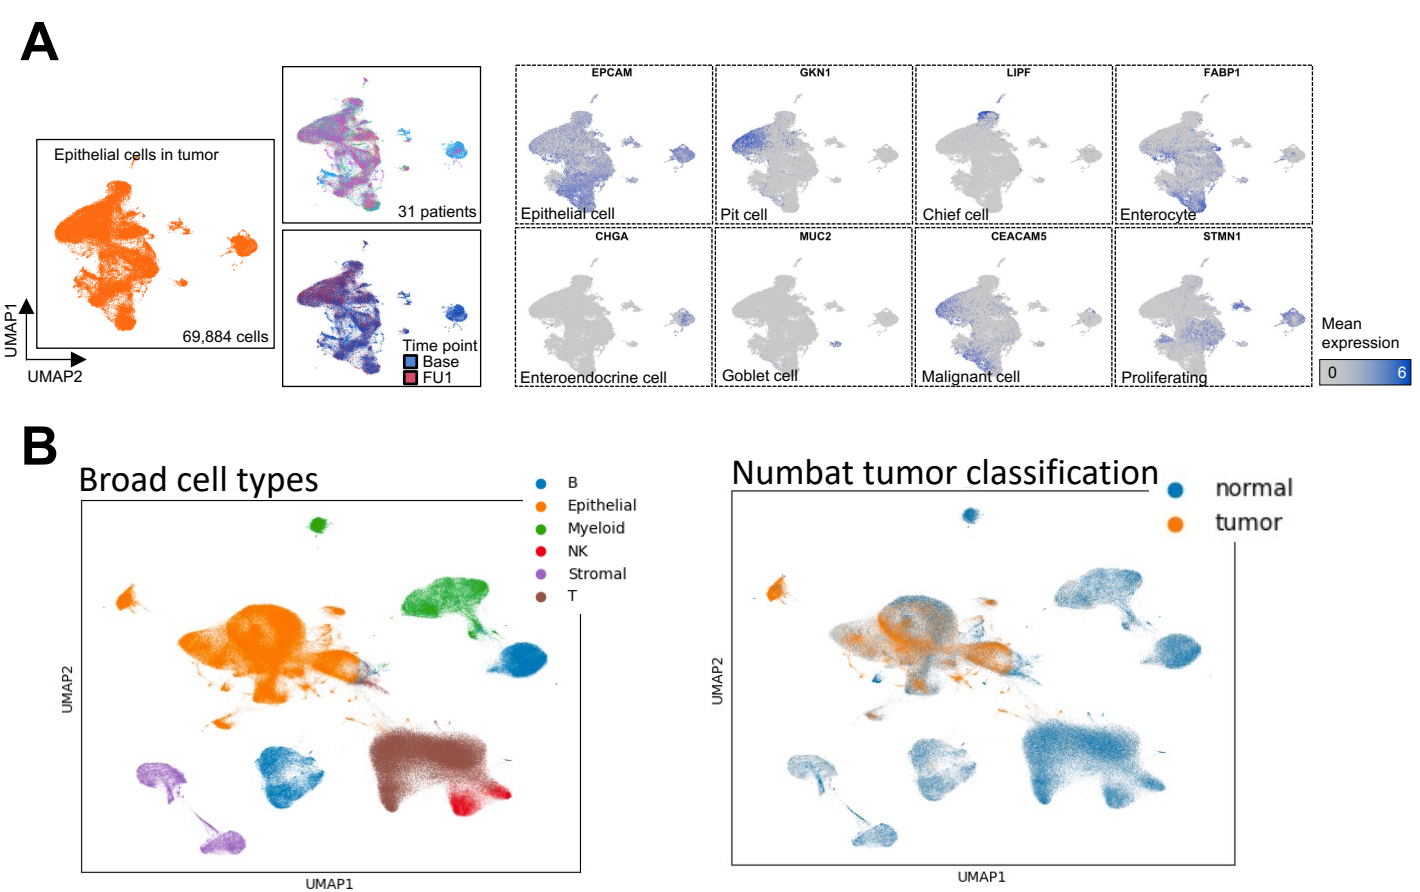

**Figure S7.** (A) UMAP embedding of single cell transcriptomes from epithelial cells obtained from all samples in this trial. Shown are UMAP embeddings with expression of key epithelial genes. (B) UMAP embeddings color coded by predicted annotation of tumor cell v.s. normal cell using Numbat.
