# Supplementary material for: Early Immune Remodeling Steers Clinical Response to First-Line Chemoimmunotherapy in Advanced Gastric Cancer
Source: PubMed Central journal article supplement — Cancer Discov. 2024 Feb 6;14(5):766–85. doi: 10.1158/2159-8290.CD-23-0857 (PMC11061611; doi:10.1158/2159-8290.cd-23-0857), 2024-02-06
Supplement: cd-23-0857_figure_s9_suppsf9.pdf [file cd-23-0857_figure_s9_suppsf9.pdf]

**A**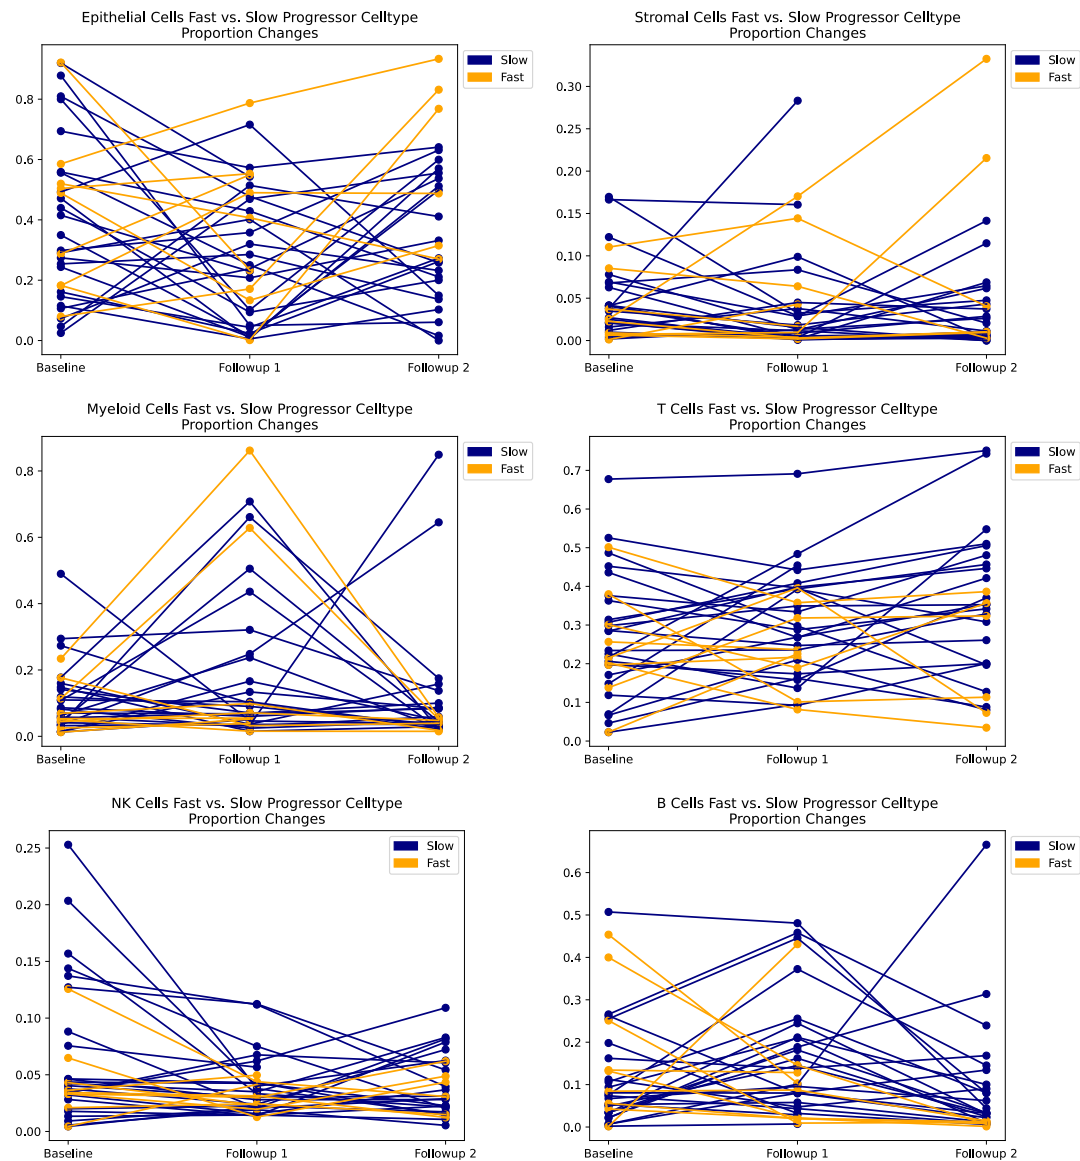**B**

Tumor Celltype Proportions by Progression Status (GS and CIN Patients Only)

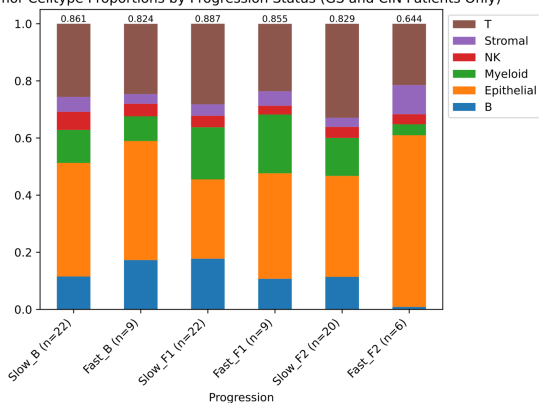

**Figure S9.** (A) Cell type proportions from scSeq shown by individual patient split by individual high-level cell types across timepoints, color coded by fast vs slow progression status. (B) Cell type proportions from scSeq data by timepoint and fast vs slow progressor status including only GS and CIN patients.
