# Supplementary material for: Early Immune Remodeling Steers Clinical Response to First-Line Chemoimmunotherapy in Advanced Gastric Cancer
Source: PubMed Central journal article supplement — Cancer Discov. 2024 Feb 6;14(5):766–85. doi: 10.1158/2159-8290.CD-23-0857 (PMC11061611; doi:10.1158/2159-8290.cd-23-0857), 2024-02-06
Supplement: cd-23-0857_figure_s10_suppsf10.pdf [file cd-23-0857_figure_s10_suppsf10.pdf]

**A****Baseline (B) epithelial programs**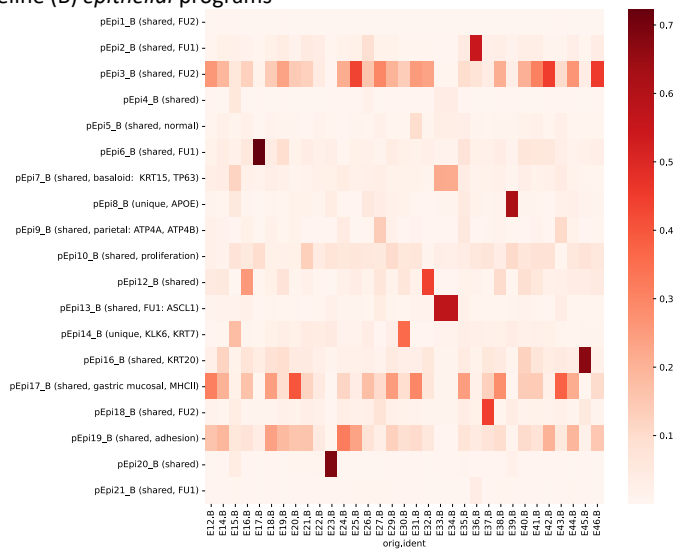**B****Follow-up timepoint 1 (FU1, post-chemo) epithelial programs**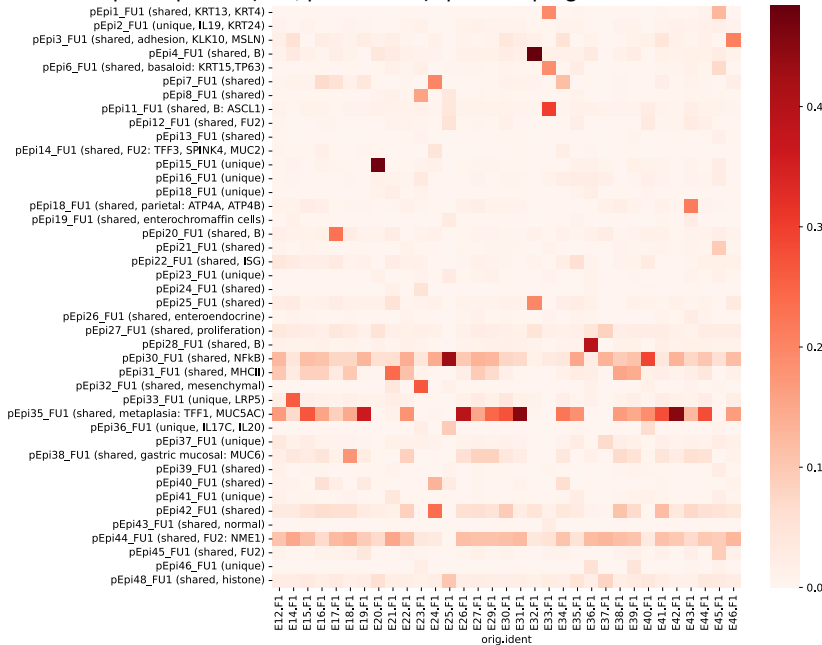**C****Follow-up timepoint 2 (FU2, post-ICB) epithelial programs**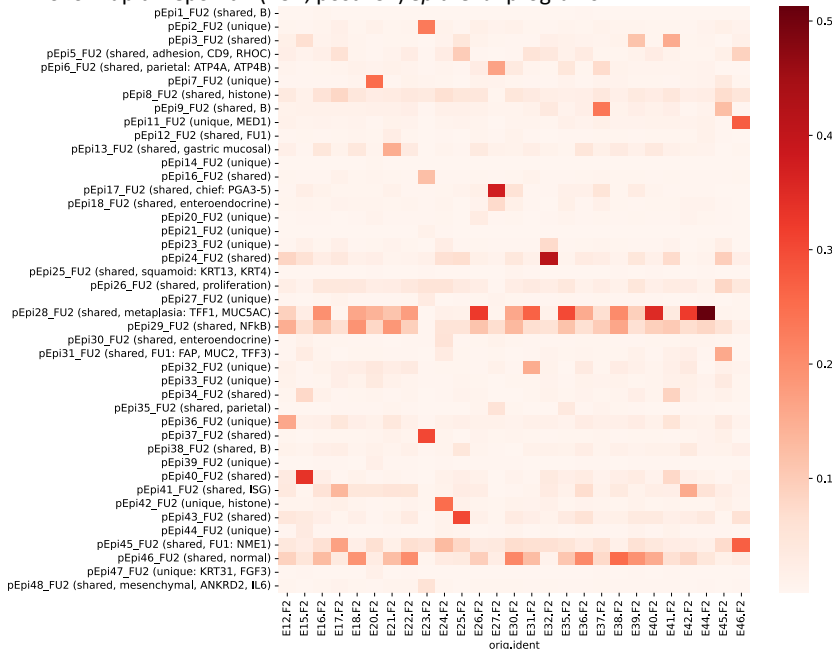

**Figure S10.** Mean usage of epithelial cNMF programs per sample at (A) baseline, (B) post-chemotherapy (FU1) and (C) post-immunotherapy (FU2).
