# Supplementary material for: Early Immune Remodeling Steers Clinical Response to First-Line Chemoimmunotherapy in Advanced Gastric Cancer
Source: PubMed Central journal article supplement — Cancer Discov. 2024 Feb 6;14(5):766–85. doi: 10.1158/2159-8290.CD-23-0857 (PMC11061611; doi:10.1158/2159-8290.cd-23-0857), 2024-02-06
Supplement: cd-23-0857_figure_s11_suppsf11.pdf [file cd-23-0857_figure_s11_suppsf11.pdf]

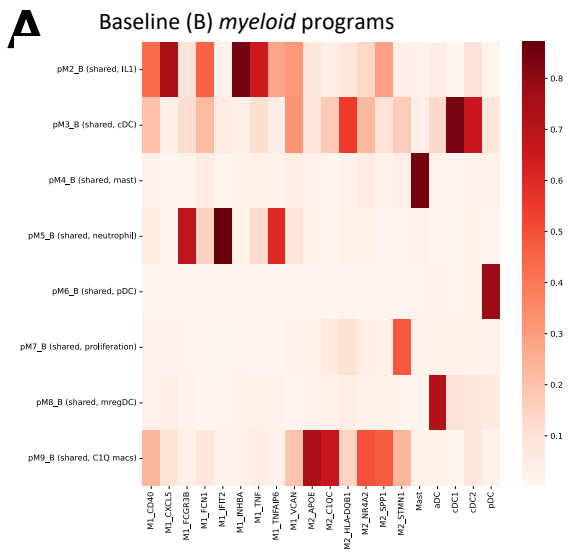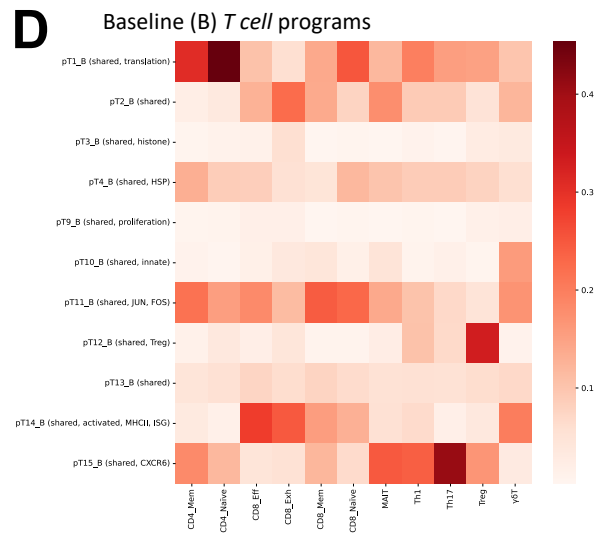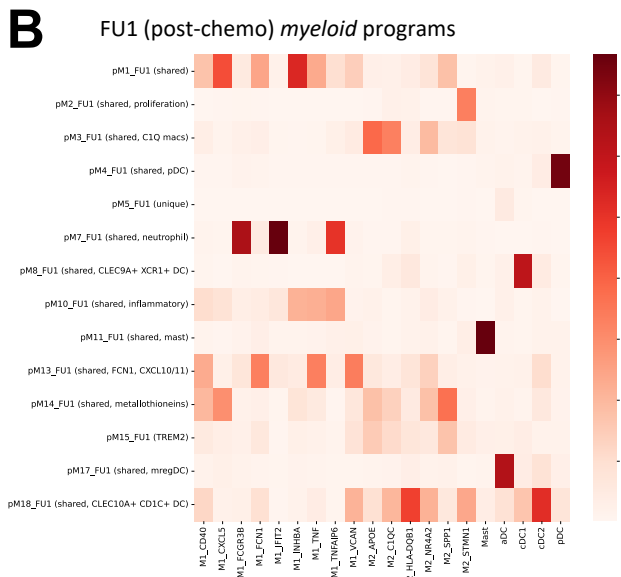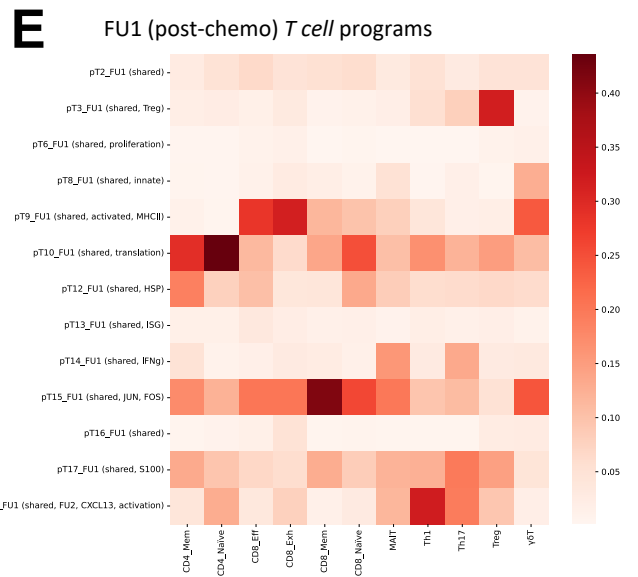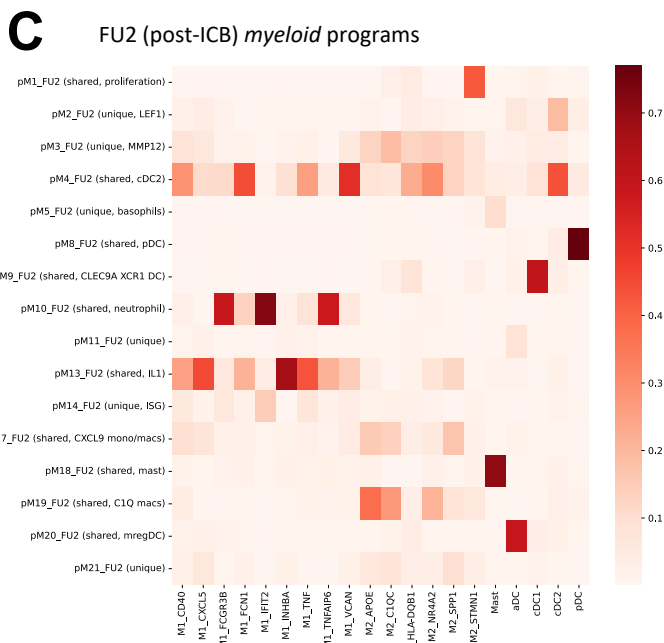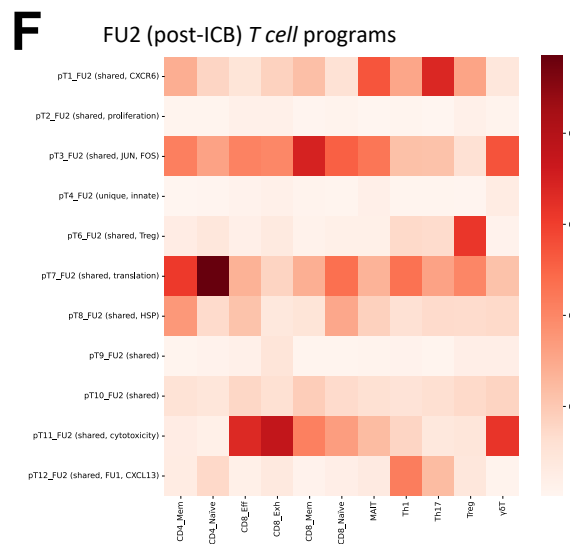

**Figure S11.** Mean usage of myeloid cNMF programs per myeloid cell subset at (A) baseline, (B) post-chemotherapy (FU1) and (C) post-immunotherapy (FU2). Mean usage of T cell cNMF programs per T cell cell subset at (D) baseline, (E) post-chemotherapy (FU1) and (F) post-immunotherapy (FU2).
