# Supplementary material for: Early Immune Remodeling Steers Clinical Response to First-Line Chemoimmunotherapy in Advanced Gastric Cancer
Source: PubMed Central journal article supplement — Cancer Discov. 2024 Feb 6;14(5):766–85. doi: 10.1158/2159-8290.CD-23-0857 (PMC11061611; doi:10.1158/2159-8290.cd-23-0857), 2024-02-06
Supplement: cd-23-0857_figure_s13_suppsf13.pdf [file cd-23-0857_figure_s13_suppsf13.pdf]

**A** FU1 (post-chemo) epithelial programs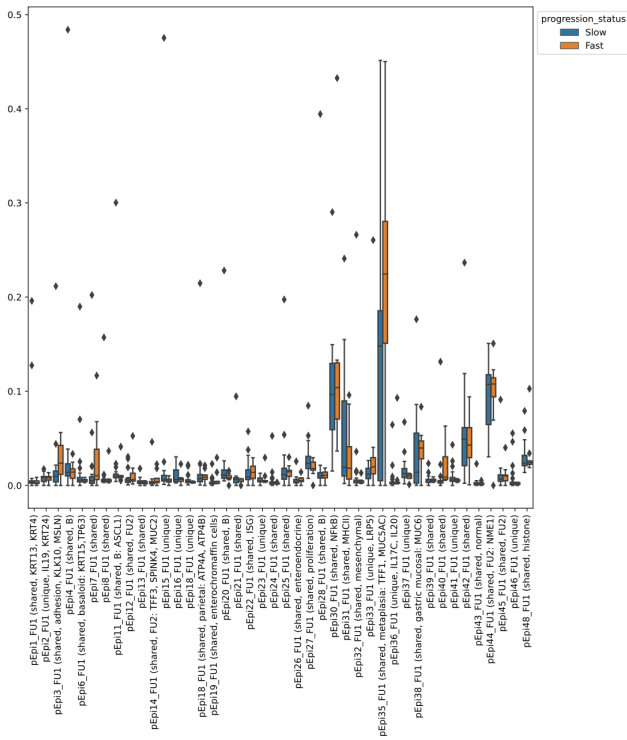**B** FU2 (post-ICB) epithelial programs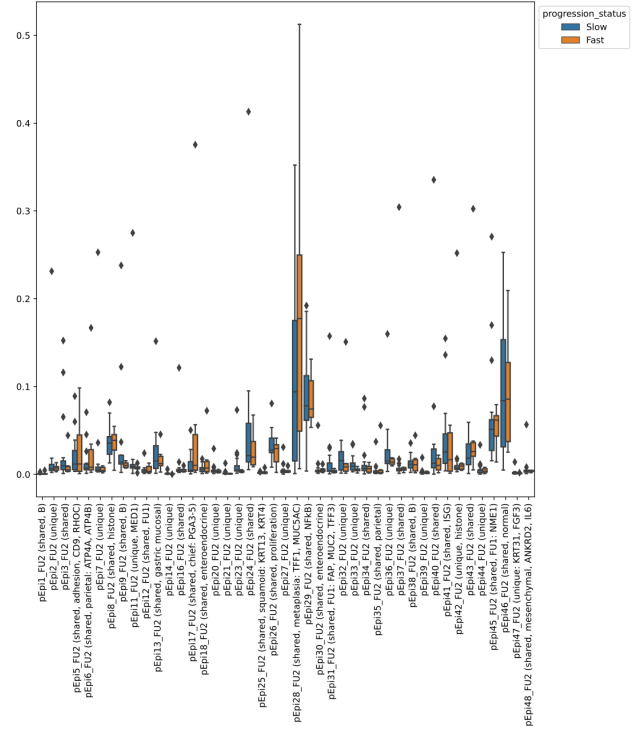

**Figure S13.** Boxplots showing usage of epithelial cNMF programs in epithelial cells of fast and slow progressors (A) post-chemotherapy (FU1) and (B) post-immunotherapy (FU2).
