# Supplementary material for: Early Immune Remodeling Steers Clinical Response to First-Line Chemoimmunotherapy in Advanced Gastric Cancer
Source: PubMed Central journal article supplement — Cancer Discov. 2024 Feb 6;14(5):766–85. doi: 10.1158/2159-8290.CD-23-0857 (PMC11061611; doi:10.1158/2159-8290.cd-23-0857), 2024-02-06
Supplement: cd-23-0857_figure_s15_suppsf15.pdf [file cd-23-0857_figure_s15_suppsf15.pdf]

# Baseline co-varying programs

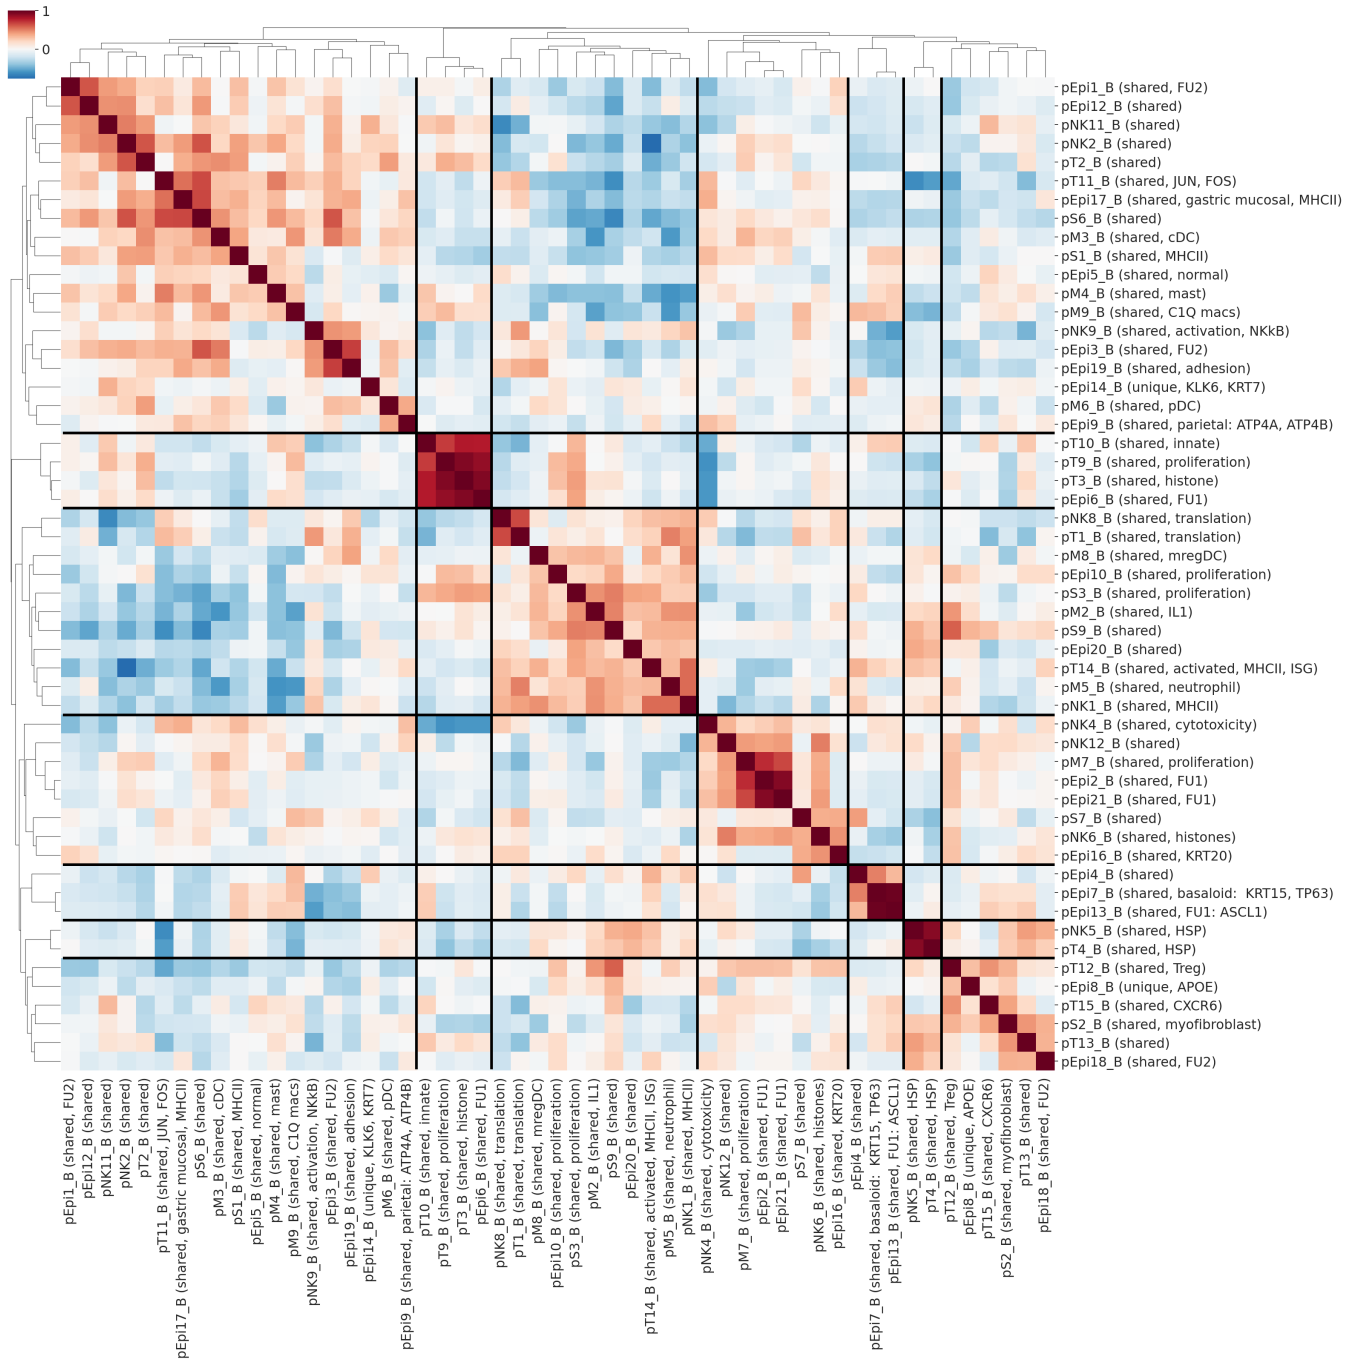

**Figure S15.** Heatmap showing pairwise correlation of gene program activities across all patient samples at baseline using the 90th percentile of patient-level program activity in epithelial, myeloid, T, NK and stromal cells. Hierarchical clustering was performed to identify clusters of co-varying proteins.
