# Supplementary material for: Early Immune Remodeling Steers Clinical Response to First-Line Chemoimmunotherapy in Advanced Gastric Cancer
Source: PubMed Central journal article supplement — Cancer Discov. 2024 Feb 6;14(5):766–85. doi: 10.1158/2159-8290.CD-23-0857 (PMC11061611; doi:10.1158/2159-8290.cd-23-0857), 2024-02-06
Supplement: cd-23-0857_figure_s18_suppsf18.pdf [file cd-23-0857_figure_s18_suppsf18.pdf]

**A**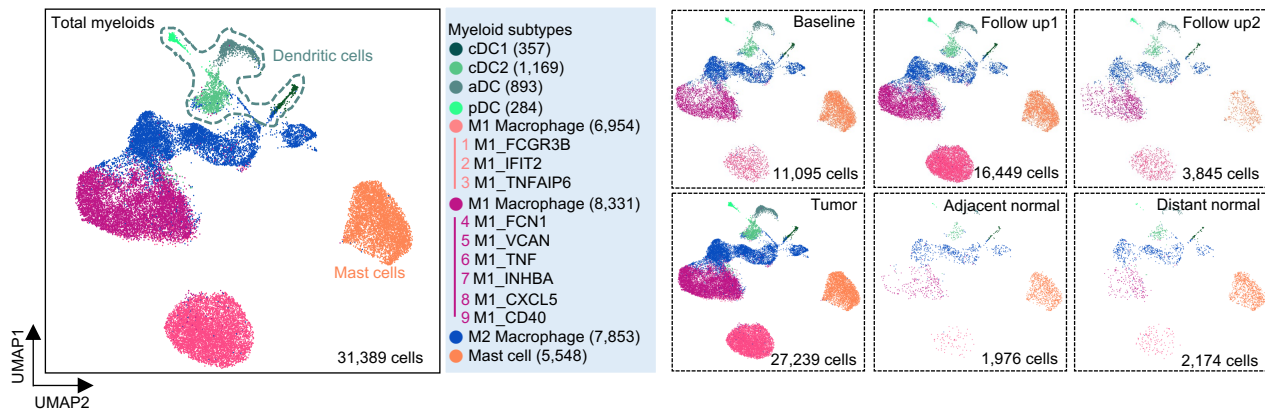**B**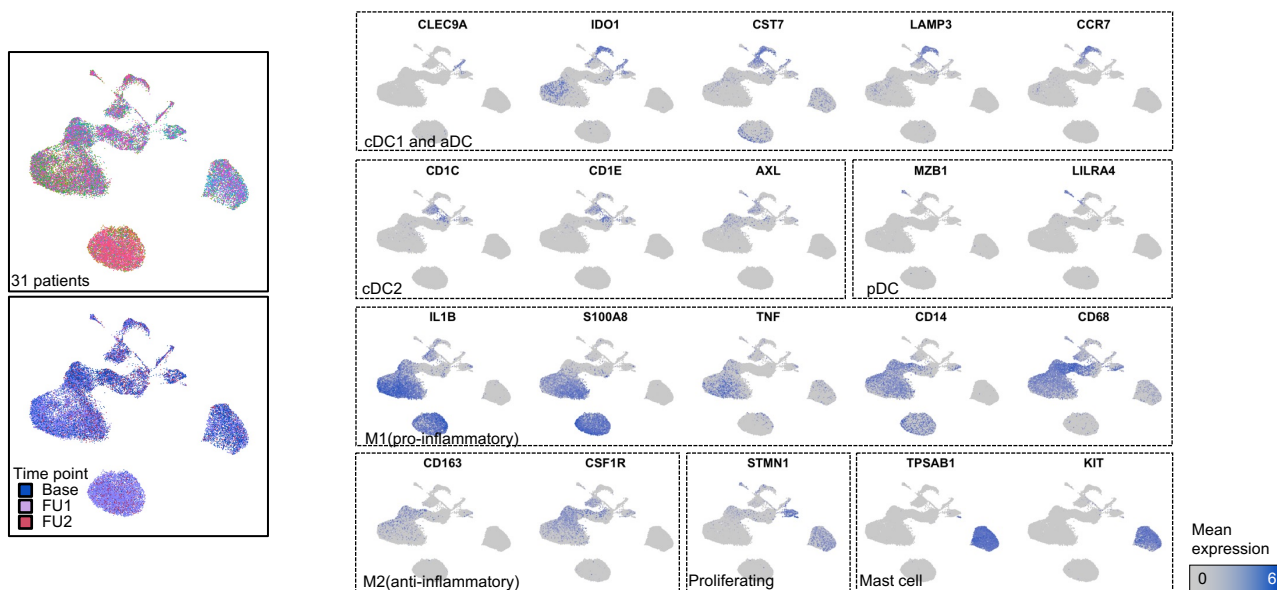

**Figure S18.** (A) UMAP embedding of single cell transcriptomes of all myeloid cells obtained from all samples in this trial. Labeled are granular myeloid cell types separated by tumor v.s. normal tissue, and by timepoint. (B) UMAP embeddings showing marker gene expression for granular myeloid cell types in (A).
