# Supplementary material for: Early Immune Remodeling Steers Clinical Response to First-Line Chemoimmunotherapy in Advanced Gastric Cancer
Source: PubMed Central journal article supplement — Cancer Discov. 2024 Feb 6;14(5):766–85. doi: 10.1158/2159-8290.CD-23-0857 (PMC11061611; doi:10.1158/2159-8290.cd-23-0857), 2024-02-06
Supplement: cd-23-0857_figure_s21_suppsf21.pdf [file cd-23-0857_figure_s21_suppsf21.pdf]

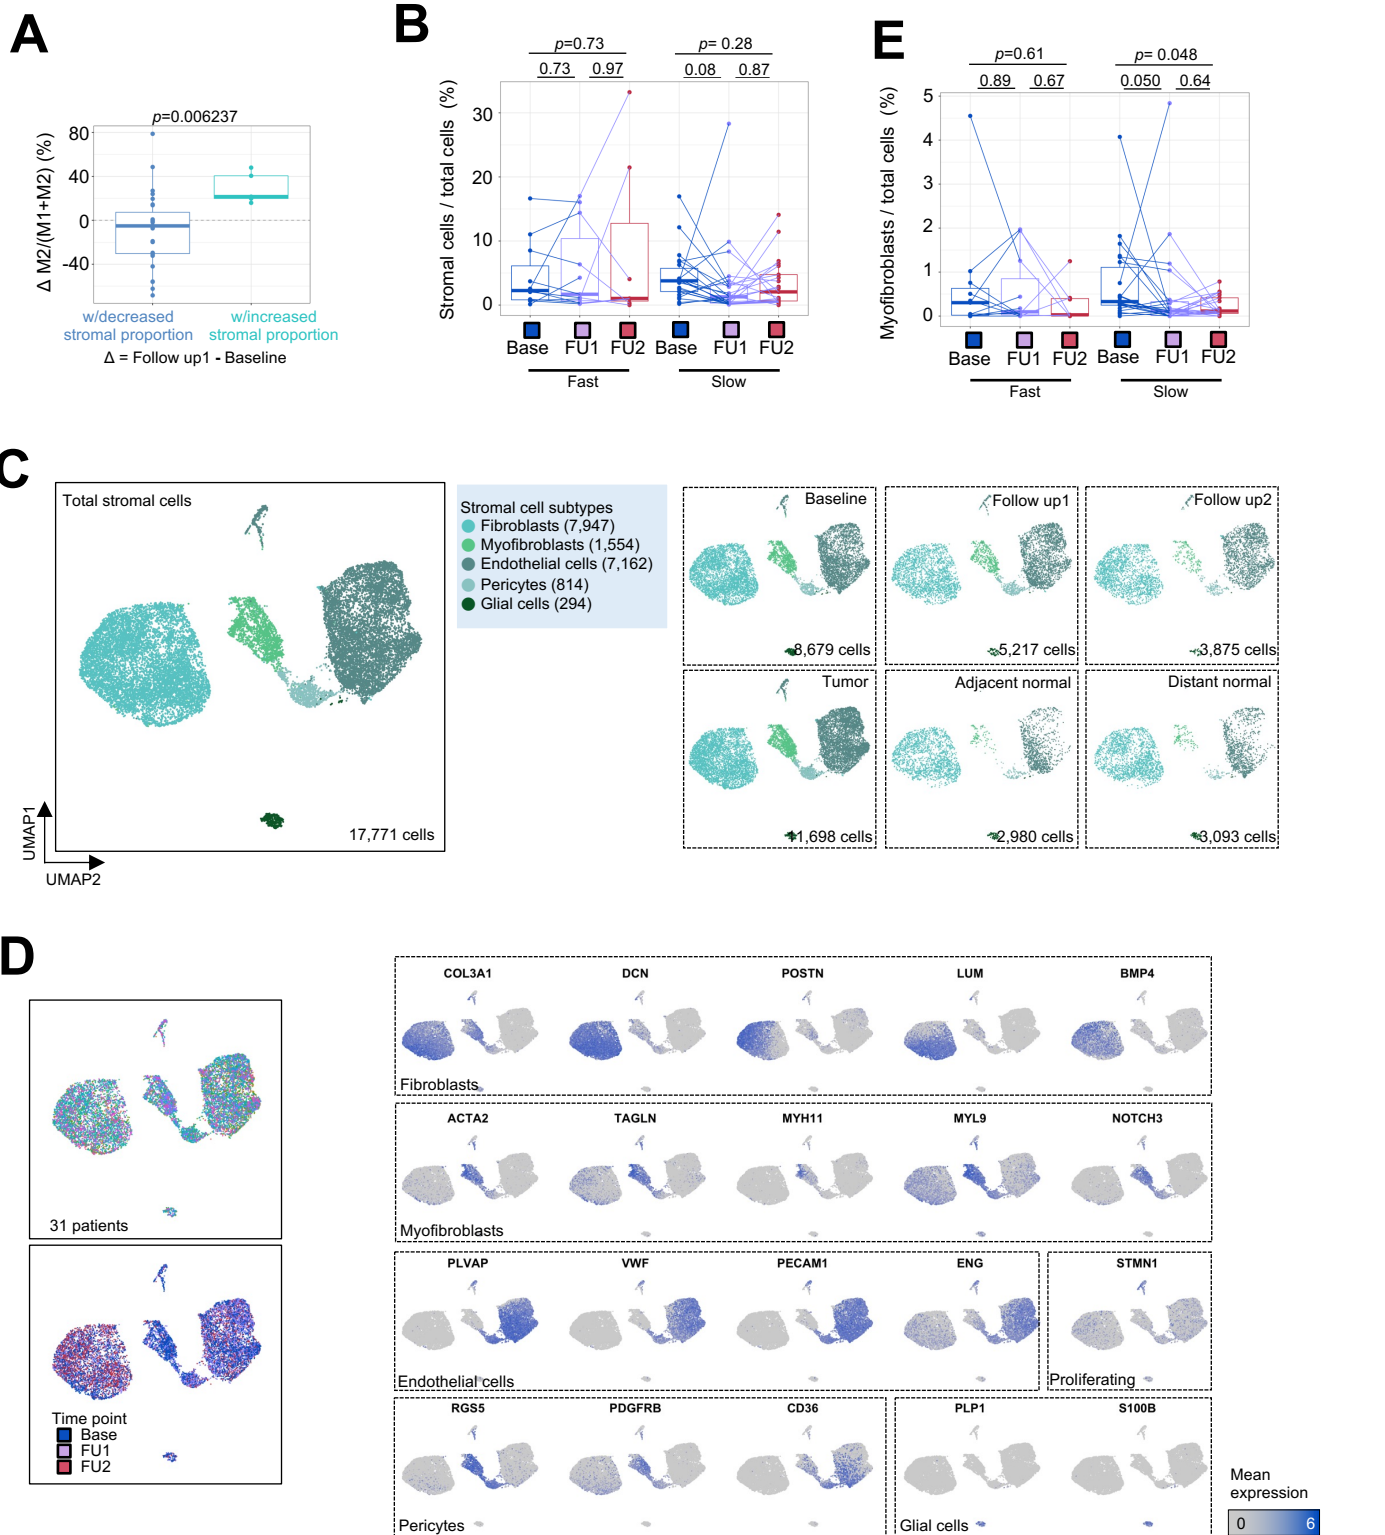

**Figure S21.** (A) Change in M2 ratio from baseline to FU1 in patients with decreased or increased stromal proportions. (B) Proportion of stromal cells in patient samples from fast and slow progressing patients split by timepoint. (C) UMAP embedding of single cell transcriptomes of all stromal cells obtained from all samples in this trial. Labeled are granular stromal cell types separated by tumor v.s. normal tissue, and by timepoint. (D) UMAP embeddings showing marker gene expression for granular stromal cell types in (C). (E) Proportion of myofibroblasts in patient samples from fast and slow progressing patients split by timepoint.
