# Supplementary material for: Early Immune Remodeling Steers Clinical Response to First-Line Chemoimmunotherapy in Advanced Gastric Cancer
Source: PubMed Central journal article supplement — Cancer Discov. 2024 Feb 6;14(5):766–85. doi: 10.1158/2159-8290.CD-23-0857 (PMC11061611; doi:10.1158/2159-8290.cd-23-0857), 2024-02-06
Supplement: cd-23-0857_figure_s23_suppsf23.pdf [file cd-23-0857_figure_s23_suppsf23.pdf]

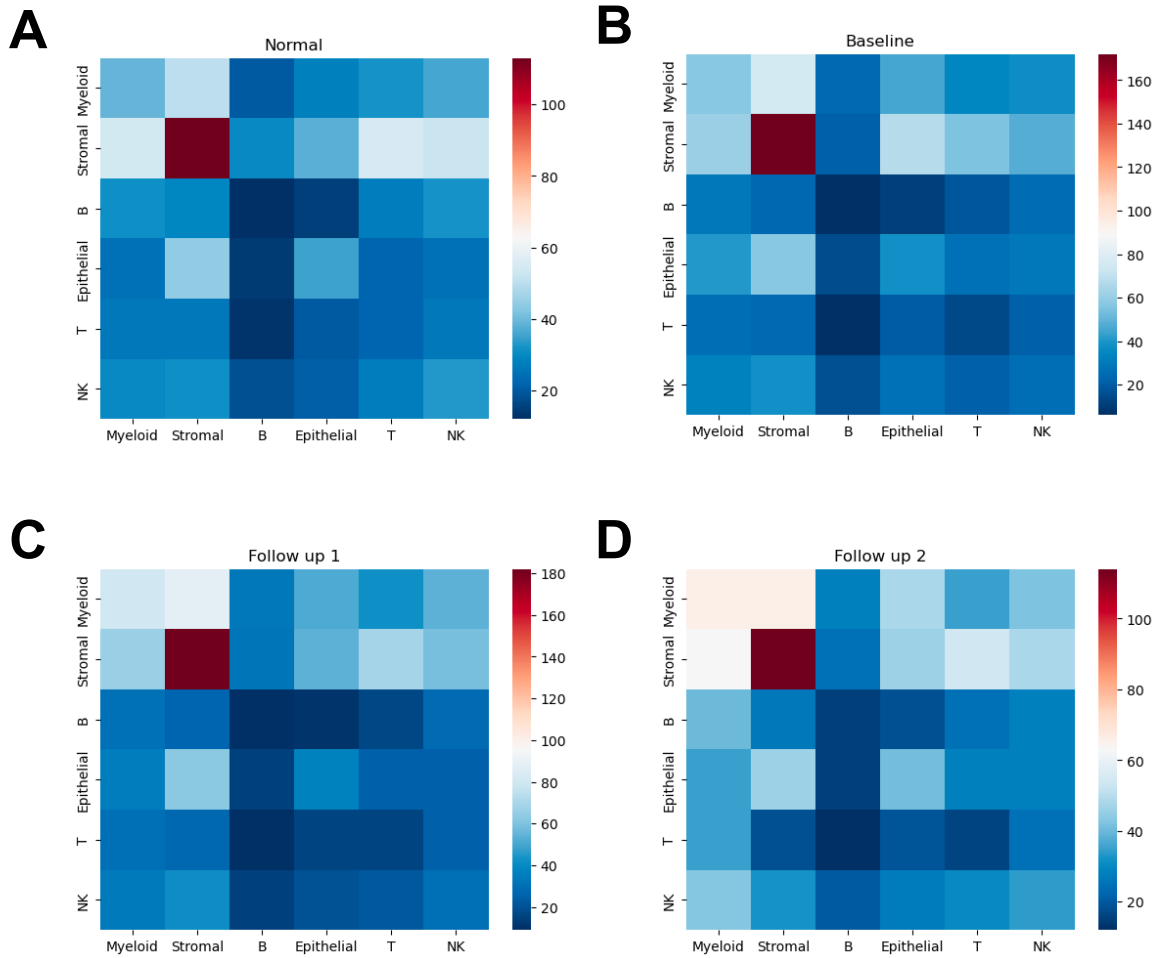

**Figure S23.** Heatmaps showing the number of significant inferred ligand-receptor interactions between major cell types using CellPhoneDB on scRNAseq data in (A) normal, (B) baseline tumor, (C) post-chemotherapy (FU1) tumor and (D) post-immunotherapy (FU2) tumor samples.
