# Supplementary material for: Early Immune Remodeling Steers Clinical Response to First-Line Chemoimmunotherapy in Advanced Gastric Cancer
Source: PubMed Central journal article supplement — Cancer Discov. 2024 Feb 6;14(5):766–85. doi: 10.1158/2159-8290.CD-23-0857 (PMC11061611; doi:10.1158/2159-8290.cd-23-0857), 2024-02-06
Supplement: cd-23-0857_figure_s24_suppsf24.pdf [file cd-23-0857_figure_s24_suppsf24.pdf]

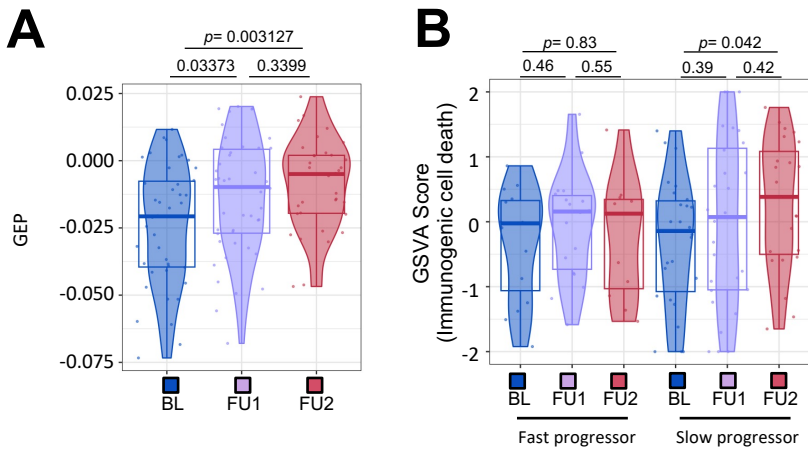

**Figure S24.** (A) Immune gene expression program signature scored from bulk RNA-seq profiles across all samples separated by timepoint. (B) Immunogenic cell death signatures scored from bulk RNA-seq profiles split by fast and slow progressing patients and by timepoint.
