# Supplementary material for: Early Immune Remodeling Steers Clinical Response to First-Line Chemoimmunotherapy in Advanced Gastric Cancer
Source: PubMed Central journal article supplement — Cancer Discov. 2024 Feb 6;14(5):766–85. doi: 10.1158/2159-8290.CD-23-0857 (PMC11061611; doi:10.1158/2159-8290.cd-23-0857), 2024-02-06
Supplement: cd-23-0857_figure_s25_suppsf25.pdf [file cd-23-0857_figure_s25_suppsf25.pdf]

**A**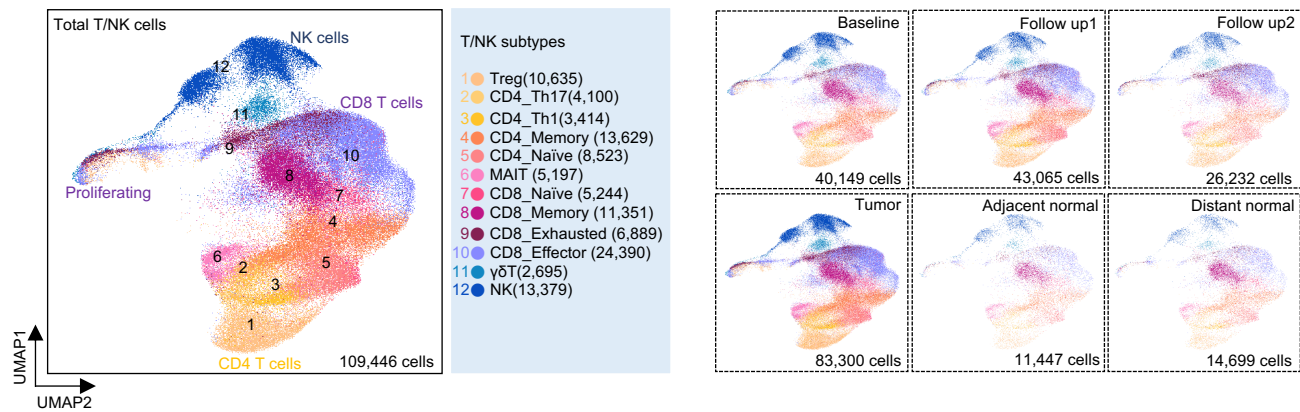**B**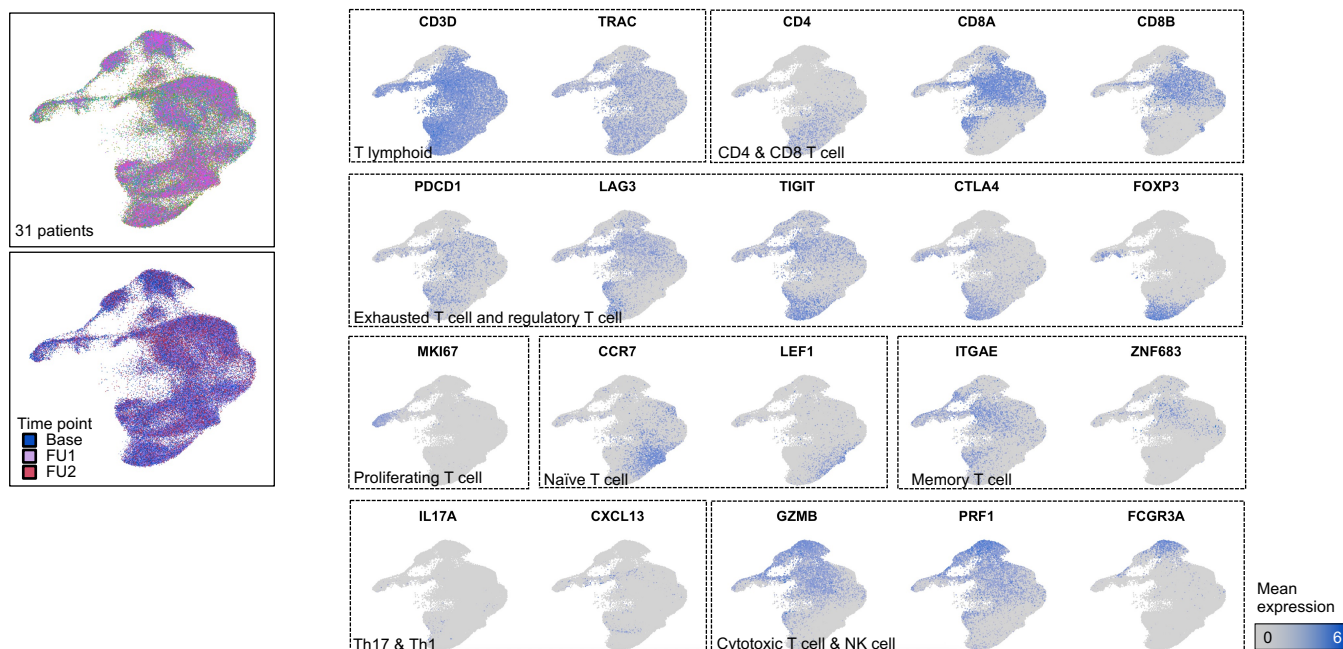

**Figure S25.** (A) UMAP embedding of single cell transcriptomes of all T cells obtained from all samples in this trial. Labeled are granular T cell subsets separated by tumor v.s. normal tissue, and by timepoint. (B) UMAP embeddings showing marker gene expression for T cell subsets in (A).
