# Supplementary material for: Early Immune Remodeling Steers Clinical Response to First-Line Chemoimmunotherapy in Advanced Gastric Cancer
Source: PubMed Central journal article supplement — Cancer Discov. 2024 Feb 6;14(5):766–85. doi: 10.1158/2159-8290.CD-23-0857 (PMC11061611; doi:10.1158/2159-8290.cd-23-0857), 2024-02-06
Supplement: cd-23-0857_figure_s26_suppsf26.pdf [file cd-23-0857_figure_s26_suppsf26.pdf]

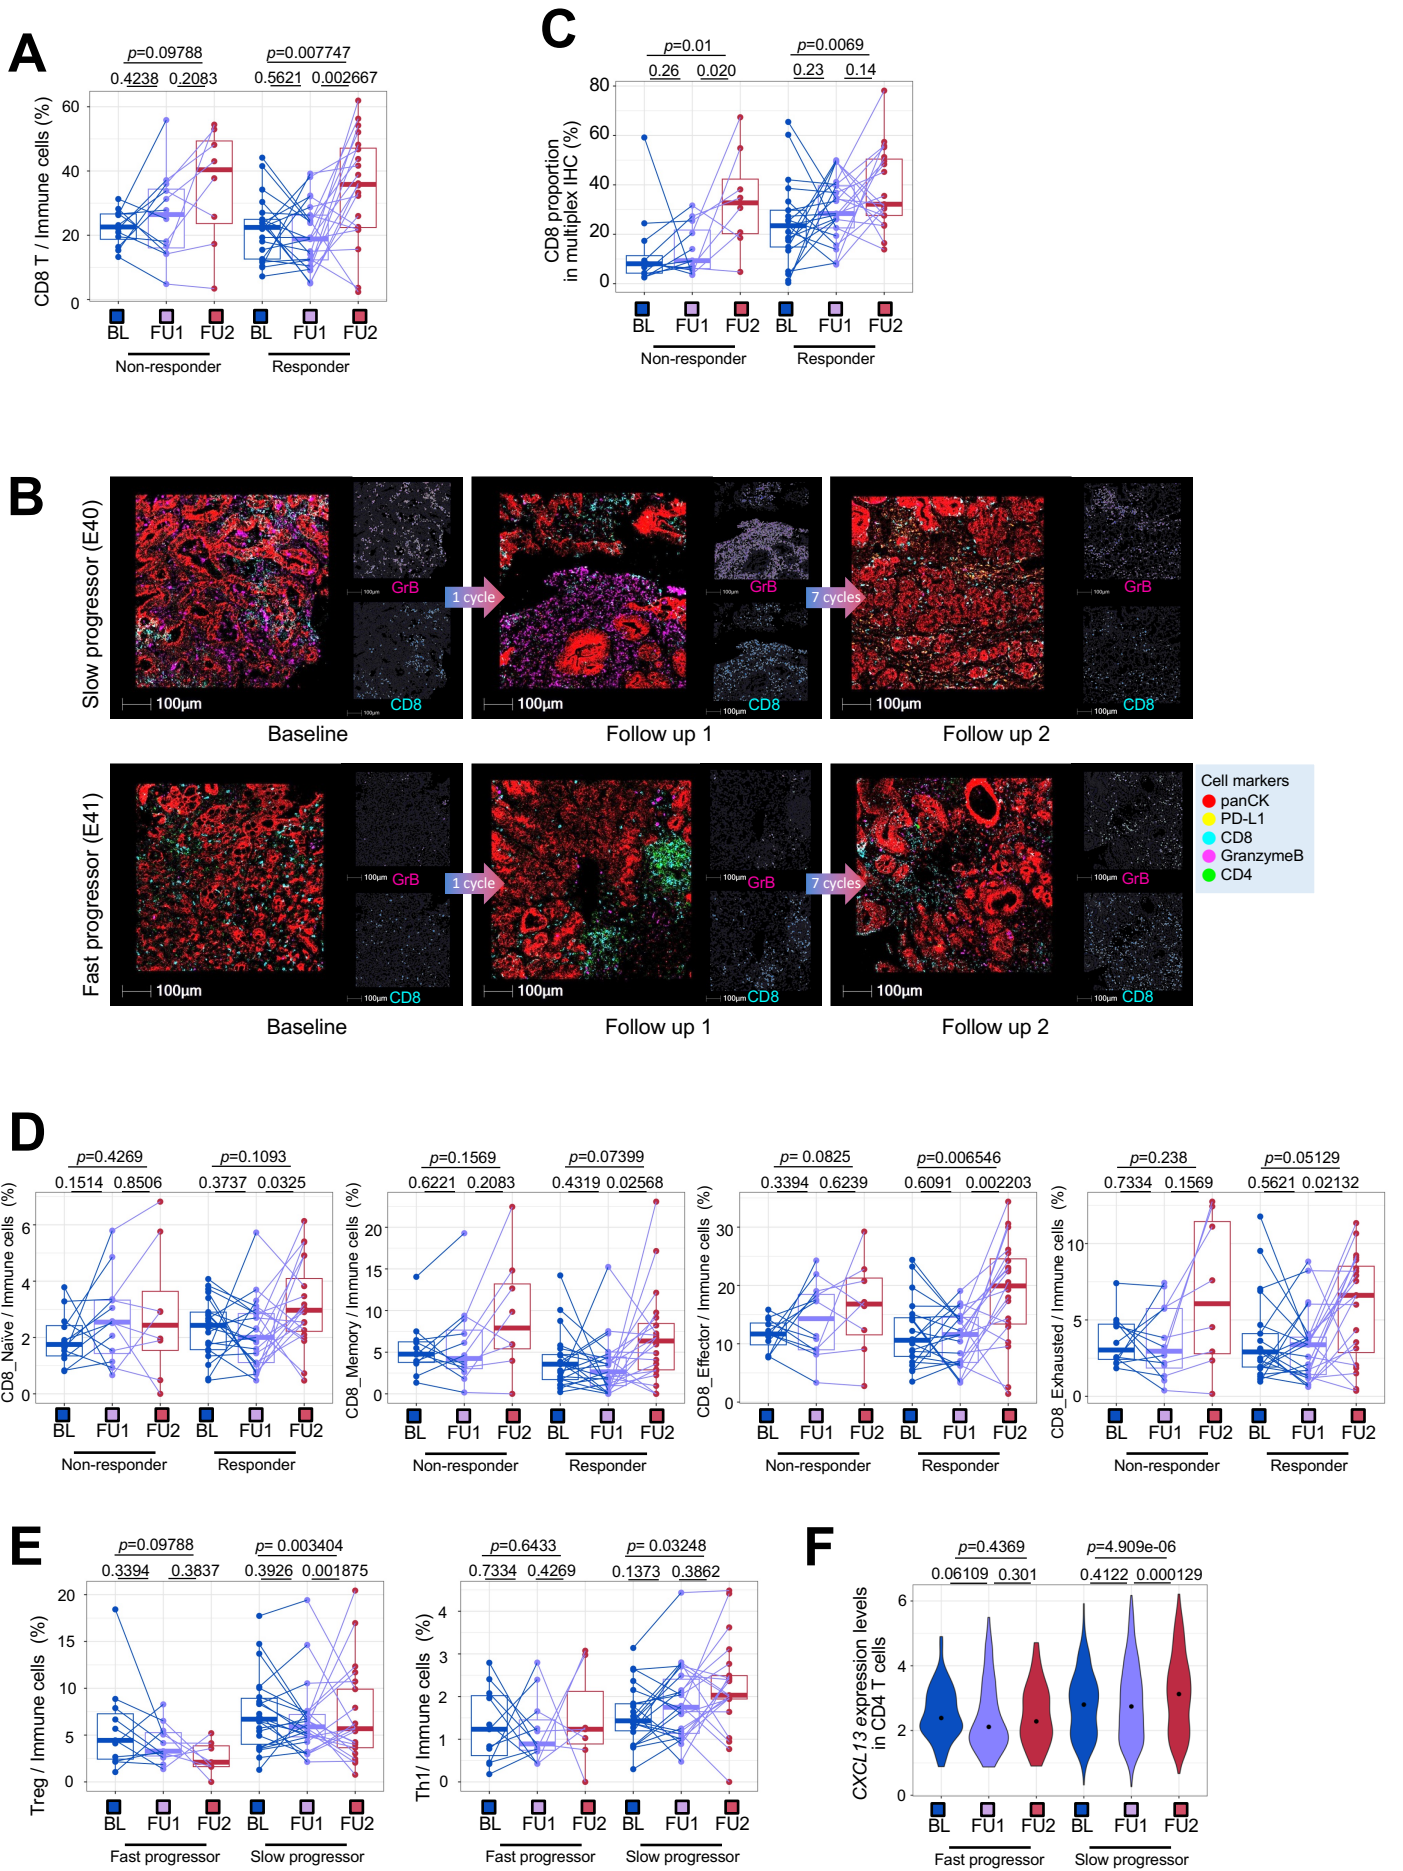

**Figure S26.** (A) Proportion of CD8 T cells in non-responder and responder patients split by timepoint. Statistical comparisons performed using a Wilcoxon signed-rank test. (B) Multiplexed immunofluorescence (mIF) images of BL, FU1 and FU2 samples from two patients, E40 (slow progressor) and E41 (fast progressor), staining for panCK, PD-L1, CD4, CD8 and Granzyme B. (C) Proportion of CD8 T cells macrophages, obtained from mIF images, at BL, FU1 and FU2 in non-responder and responder patients. Statistical comparison performed using a Wilcoxon signed-rank test. (D) Proportion of naive, memory, effector and exhausted CD8 T cell subsets in non-responder and responder patients split by timepoint. Statistical comparisons performed using a Wilcoxon signed-rank test. (E) Proportion of regulatory T cell and Th1 CD4 T cell subsets in fast v.s. slow progressor patients split by timepoint. Statistical comparisons performed using a Wilcoxon signed-rank test. (F) Expression of CXCL13 in CD4 T cells in fast v.s. slow progressor patients split by timepoint. Statistical comparisons performed using a Wilcoxon signed-rank test.
