# Supplementary material for: Early Immune Remodeling Steers Clinical Response to First-Line Chemoimmunotherapy in Advanced Gastric Cancer
Source: PubMed Central journal article supplement — Cancer Discov. 2024 Feb 6;14(5):766–85. doi: 10.1158/2159-8290.CD-23-0857 (PMC11061611; doi:10.1158/2159-8290.cd-23-0857), 2024-02-06
Supplement: cd-23-0857_figure_s27_suppsf27.pdf [file cd-23-0857_figure_s27_suppsf27.pdf]

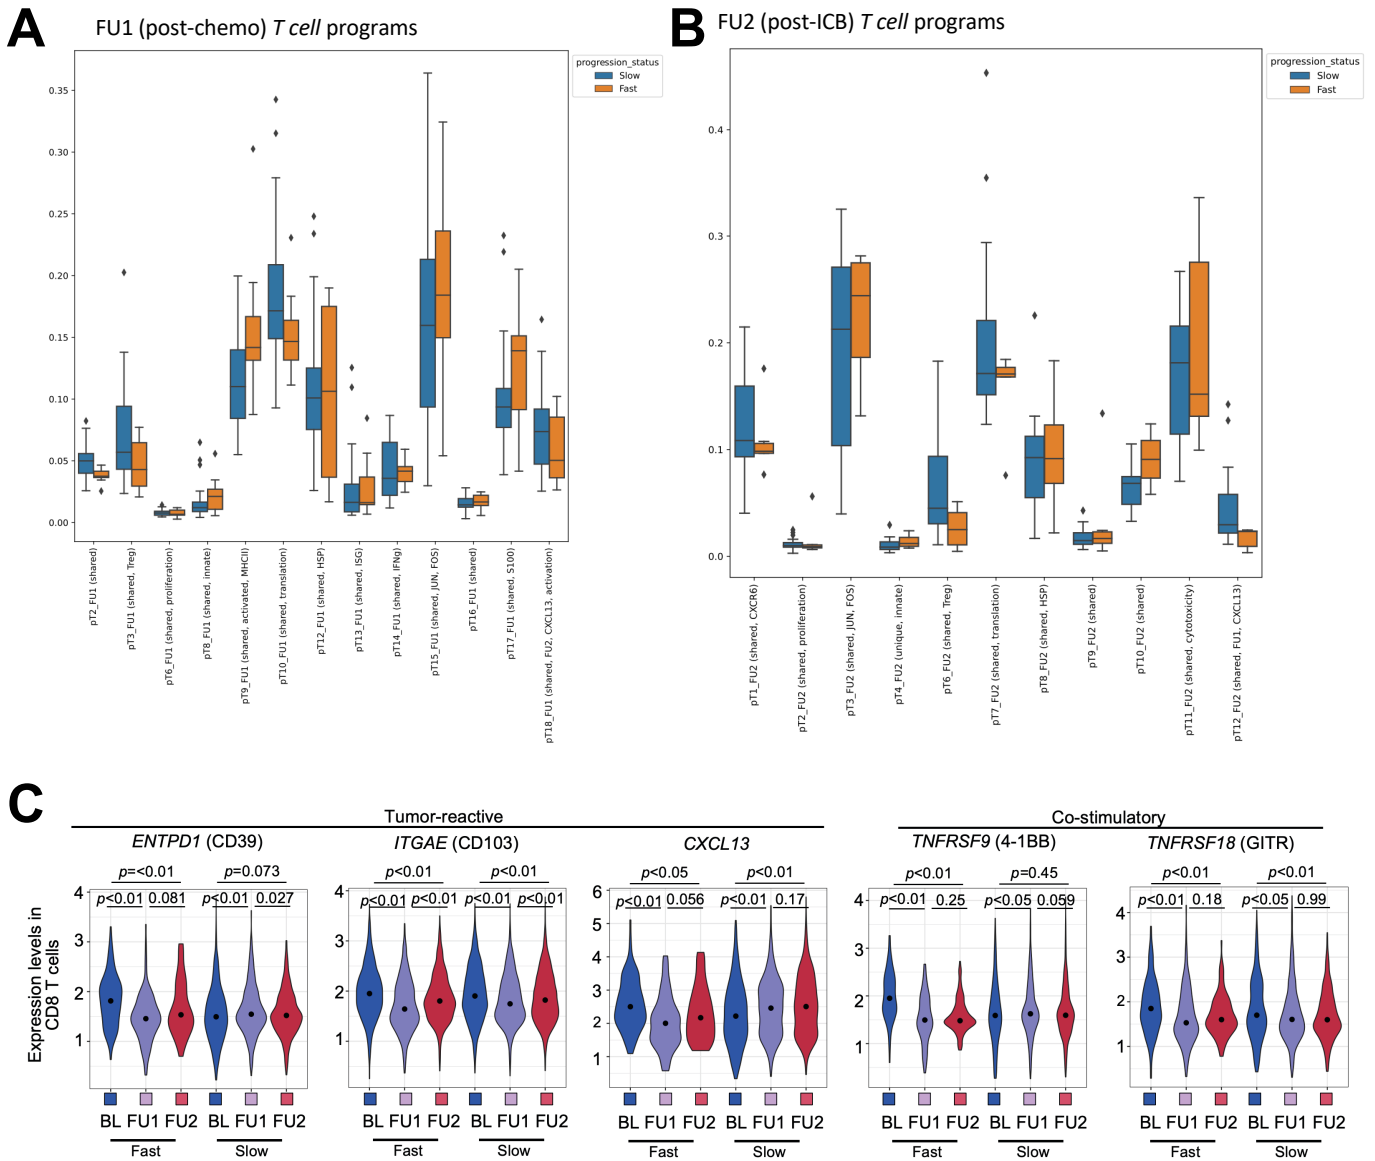

**Figure S27.** Boxplots showing usage of T cell cNMF programs in T cells of fast and slow progressors (A) post-chemotherapy (FU1) and (B) post-immunotherapy (FU2). (C) Expression of CD39, CD103, CXCL13, 4-1BB and GITR in single CD8 T cells segregated by timepoint (BL, FU1, FU2) and by fast versus slow progressing patients. Statistical comparison performed using a Wilcoxon signed-rank test.
